# Kinetics of HIV-Specific CTL Responses Plays a Minimal Role in Determining HIV Escape Dynamics

Yiding Yang<sup>1\*</sup> and Vitaly V. Ganusov<sup>1,2,3</sup>

<sup>1</sup>Department of Microbiology, University of Tennessee, Knoxville, TN 37996, USA,

<sup>2</sup>National Institute for Mathematical and Biological Synthesis

University of Tennessee, Knoxville, TN 37996, USA

<sup>3</sup>Department of Mathematics, University of Tennessee, Knoxville, TN 37996, USA

\*Corresponding author (yyang42@utk.edu)

1

## Abstract

2 Cytotoxic T lymphocytes (CTLs) have been suggested to play an important role in controlling human  
3 immunodeficiency virus (HIV-1 or simply HIV) infection. HIV, due to its high mutation rate, can  
4 evade recognition of T cell responses by generating escape variants that can not be recognized by  
5 HIV-specific CTLs. Although HIV escape from CTL responses has been well documented, factors  
6 contributing to the timing and the rate of viral escape from T cells have not been fully elucidated.  
7 Fitness costs associated with escape and magnitude of the epitope-specific T cell response are general-  
8 ly considered to be the key in determining timing of HIV escape. Several previous analyses generally  
9 ignored the kinetics of T cell responses in predicting viral escape by either considering constant or  
10 maximal T cell response; several studies also considered escape from different T cell responses to be  
11 independent. Here we focus our analysis on data from two patients from a recent study with relatively  
12 frequent measurements of both virus sequences and HIV-specific T cell response to determine impact  
13 of CTL kinetics on viral escape. In contrast with our expectation we found that including temporal  
14 dynamics of epitope-specific T cell response did not improve the quality of fit of different models to  
15 escape data. We also found that for well sampled escape data the estimates of the model parameters  
16 including T cell killing efficacy did not strongly depend on the underlying model for escapes: models  
17 assuming independent, sequential, or concurrent escapes from multiple CTL responses gave similar  
18 estimates for CTL killing efficacy. Interestingly, the model assuming sequential escapes (i.e., escapes  
19 occurring along a defined pathway) was unable to accurately describe data on escapes occurring  
20 rapidly within a short-time window, suggesting that some of model assumptions must be violated  
21 for such escapes. Our results thus suggest that the current sparse measurements of temporal CTL  
22 dynamics in blood bear little quantitative information to improve predictions of HIV escape kinetics.  
23 More frequent measurements using more sensitive techniques and sampling in secondary lymphoid  
24 tissues may allow to better understand whether and how CTL kinetics impacts viral escape.

25 **Keywords:** HIV, CTL escape, multiple responses, mathematical model, model fitting, likelihood.

26 **Abbreviations:** CTL, cytotoxic T lymphocyte; HIV, human immunodeficiency virus; SIV, simi-  
27 an immunodeficiency virus.

28 **Short running title:** CTL dynamics and viral escape

## 29 1 Introduction

30 In 2014, the number of people living with human immunodeficiency virus 1(HIV-1 or simply HIV)  
31 was estimated as 36.9 million [50], with roughly 2 million new HIV infections and 1.2 million people  
32 dead of HIV-induced diseases (AIDS) [51]. Cytotoxic CD8<sup>+</sup> T lymphocyte (CTL) responses play  
33 an important role in control of virus replication [6, 38] by modulating some important predictors of  
34 disease progression (e.g., viral set-point and the rate of CD4<sup>+</sup> loss rate [46]). Generation of HIV-  
35 specific CD8<sup>+</sup> T cells by vaccination is one of the current approaches in developing HIV vaccines  
36 [23, 49]. However, HIV is able to generate mutants (termed “CTL escape mutants”) that are not  
37 recognized by HIV-specific T cells, which may be one of the reasons for failure of T cell based vaccines  
38 [3, 21, 44]. Better understanding of mechanisms of viral escape and principles governing CD8<sup>+</sup> T cell  
39 responses to HIV may allow us to evaluate *in silico* a potential efficacy of T cell-based HIV vaccines.

40 Viral escape from CTL responses follows a somewhat predictive pattern with more dominant  
41 (larger magnitude) CTL responses leading to earlier viral escape [4, 31]. However, not every CTL  
42 response elicits an escape and sometimes viral mutations occur in regions predicted to be recognized  
43 by CTLs but in the absence of detectable response [20]. To understand the timing and kinetics  
44 of CTL escape in HIV/SIV infection, mathematical models have been proposed previously on the  
45 dynamics of viral escape from a single CTL response (e.g., [2, 12, 15–17, 33, 42]). These initial  
46 models made a strong assumption of independent viral escape — i.e., it was assumed that viruses  
47 escaping from different CTL responses do not compete. Recent work, however, suggested presence of  
48 clonal interference and genetic hitchhiking among immune escape variants through reconstruction of  
49 HIV whole genome haplotypes [39], and similar concurrent CTL escapes were observed in four HIV-  
50 infected patients [29]. Clonal interference was suggested to impact the estimates of the escape rates  
51 [18, 19]. Even though several models have been developed to describe the dynamics of escapes from  
52 multiple CTL responses (e.g., [16–19, 26, 48]), many of these studies involved only model simulations  
53 and did not use information on the actual kinetics of HIV-specific CTL responses in predicting viral  
54 escape.

55 Here we explored whether including experimentally measured CTL kinetics improves description  
56 of the viral escape data. In doing so we compared predictions of three alternative models of viral  
57 escape from CTL responses such as independent escapes, sequential escapes, and concurrent escapes.  
58 In the first model (independent escapes) we assumed that escape from any given CTL response  
59 occurs independently of other escapes and directly from the wild-type, i.e., we ignored the effects of  
60 clonal interference – in essence assuming high effective population size and/or high recombination  
61 rate. Of note, several recent experimental papers also assumed independent escapes [4, 20, 31]. In the  
62 second model (sequential escape) we assumed that escapes from different CTL responses occur along a  
63 defined pathway, generally set by the sequences of escape occurrence in the data. This model assumes  
64 strong clonal interference which may arise at low effective population size or when recombination rate  
65 is low. Finally, in the third model (concurrent escape) we tracked all escape variants simultaneously  
66 thus allowing for co-existence of multiple escape variants (i.e., escapes could occur along multiple  
67 alternative pathways). Interestingly, we found that for well sampled data on virus evolution the  
68 estimated CTL killing efficacies were independent of the model for viral escape. Some escape data  
69 could not be well described by the sequential escape model for biologically reasonable parameters.  
70 Furthermore, explicitly taking CTL kinetics into account did not improve the quality of fit of different  
71 models to escape data. Our results suggest that CTL kinetics in the blood as it is currently available  
72 may bear limited information relevant to improve description of kinetics of HIV escape from CTL  
73 responses.

## 74 **2 Materials and Methods**

### 75 **2.1 Experimental data**

76 Experimental details of patient enrollment and data collection were described in detail previously  
77 [20, 31]. In short, data from 17 patients in the Center for HIV/AIDS Vaccine Immunology (CHAVI)  
78 infected acutely with HIV-1 (subtypes B or C) were analyzed in great detail. All patients were infected  
79 with a single transmitted/founder (T/F) virus as determined by the single genome amplification and  
80 sequencing (SGA/S), and there were enough samples to accurately quantify CTL response to the  
81 whole viral proteome. In each patient, the kinetics of virus-specific CTL (CD8<sup>+</sup> T cell) responses  
82 were measured using peptide-stimulated IFN- $\gamma$  ELISPOT assay and/or intracellular cytokine staining  
83 (ICS) six months after enrollment using peptides matched to the founder virus sequence [20, 31]. For  
84 CTL responses measured by ELISPOT, the reported magnitude of the response was the number of  
85 cells, producing IFN- $\gamma$ , per 10<sup>6</sup> peripheral blood mononuclear cells (PBMC). Multiple viruses were  
86 sequenced by SGA/S, and all sequences were compared at sites coding for CTL epitopes and changes  
87 in the percentage of transmitted (wild-type) sequences were followed over time [31]. The dynamics of  
88 the HIV-specific CTL responses and viral escape from epitope-specific CTL responses were measured  
89 longitudinally. Escape mutants were identified as viral variants with mutations in regions recognized  
90 by patient's CTL responses with a reduced (or fully abrogated) production of IFN- $\gamma$  following T  
91 cell stimulation. In many cases mutation in a single position was responsible for the escape. In our  
92 analysis all viral variants which did not have the wild-type amino acid in the epitope region were  
93 considered as escape variants.

94 Review of the virus evolution and CTL dynamics data in all 17 patients revealed some data  
95 limitations. In particular, data for many patients lacked adequate temporal resolution to accurately  
96 estimate virus escape rates. In the vast majority of viral escape variants, escapes often occurred  
97 rapidly between two sequential time points with the frequency of the escape variant jumping from  
98 0 to 1. While previously it was suggested that such data may be modified to provide an estimate  
99 of the escape rate [2, 12, 16], such approaches may lead to biased parameter estimates [26]. While  
100 development of a method for unbiased estimation of escape rate from sparse data is ongoing (Ganusov  
101 et al., ms. in preparation), for this analysis we focused on patients CH131 and CH159 in which viral  
102 escape rates could potentially be accurately estimated due to sufficiently frequent sampling. While  
103 data from these patients were presented before [31], linking of escape and CTL response dynamics  
104 was not yet performed.

### 105 **2.2 Model of viral escape from a single CTL response**

106 Models describing the dynamics of viral escape from a single cytotoxic T lymphocyte (CTL) response  
107 have been developed and adopted by different researchers (e.g., [2, 12, 15–17]). Here we start with  
108 the basic model formulated earlier [17], and extend it to viral escape dynamics from multiple CTL  
109 responses. The model of viral escape from a single CTL response can be extended from the basic  
110 viral dynamics model [40] in the following way:

$$\begin{aligned}
 \frac{dT(t)}{dt} &= s(T_0 - T(t)) - \beta_w T(t)V_w(t) - \beta_m T(t)V_m(t), \\
 \frac{dI_w(t)}{dt} &= \beta_w(1 - \mu)T(t)V_w(t) - \delta I_w(t) - kI_w(t), \\
 \frac{dI_m(t)}{dt} &= \beta_m T(t)V_m(t) + \beta_w \mu T(t)V_w(t) - \delta I_m(t), \\
 \frac{dV_w(t)}{dt} &= p_w I_w(t) - c_v V_w(t), \\
 \frac{dV_m(t)}{dt} &= p_m I_m(t) - c_v V_m(t),
 \end{aligned} \tag{1}$$

111 where  $T(t)$  is the density of uninfected target cells;  $I_w(t)$  and  $I_m(t)$  is the density of target cells  
 112 infected by the wild-type or escape variant viruses, respectively;  $V_w(t)$  and  $V_m(t)$  is the density of  
 113 wild-type or escape variant viruses, respectively;  $s$  is the turnover rate of uninfected target cells;  $T_0$   
 114 is the preinfection level of uninfected target cells;  $\beta_w$  and  $\beta_m$  is infection rate of wild-type or escape  
 115 variant viruses, respectively;  $\mu$  is the probability of mutation from wild-type to escape mutant during  
 116 reverse transcription of viral RNA into proviral DNA;  $\delta$  is the death rate of infected cells due to viral  
 117 pathogenicity;  $k$  is the killing rate of wild-type virus infected cell due to CTL response;  $p_w$  and  $p_m$  is  
 118 the rate at which cells infected by wild-type or escape mutant viruses produce viruses; and  $c_v$  is the  
 119 clearance rate of free viral particles.

120 In this model (eqn. (1)), we assume that target cells infected by wild-type ( $V_w(t)$ ) and escape  
 121 viruses ( $V_m(t)$ ) differ by two factors: viral infectivity ( $\beta_w$  and  $\beta_m$ ) and the rate of virus production  
 122 ( $p_w$  and  $p_m$ ). Given that *in vivo* viral particles are short-lived [41, 43], to a good approximation  
 123 we may assume a quasi steady state for the virus particle concentration leading to  $V_w^*(t) = \frac{p_w}{c_v} I_w(t)$   
 124 and  $V_m^*(t) = \frac{p_m}{c_v} I_m(t)$ . We define a fitness cost  $c = 1 - \frac{\beta_m p_m}{\beta_w p_w}$ , where  $c$  can be positive or negative.  
 125 Positive  $c$  means true fitness cost of escape mutations, that is escape variant has a lower replication  
 126 rate ( $\beta_m p_m \leq \beta_w p_w$ ) [45], and negative  $c$  implies fitness advantage of escape virus [45, 52]. By  
 127 straightforward calculation, the system (eqn. (1)) can be written as

$$\begin{aligned}
 \frac{dV_w^*(t)}{dt} &= [(1 - \mu)r(t) - \delta - k]V_w^*(t), \\
 \frac{dV_m^*(t)}{dt} &= [(1 - c)r(t) - \delta]V_m^*(t) + \mu r(t)V_w^*(t)\frac{p_m}{p_w},
 \end{aligned} \tag{2}$$

128 For convenience, we replace  $V_w^*(t)$  and  $V_m^*(t)$  by  $w(t)$  or  $m(t)$ , respectively, and assume that the  
 129 wild-type and escape viruses differ only in the rate of infectivity (that is  $\beta_w \geq \beta_m$  and  $p_w = p_m$ ) [20],  
 130 the system (2) can be simplified as

$$\begin{aligned}
 \frac{dw(t)}{dt} &= [(1 - \mu)r(t) - \delta - k]w(t), \\
 \frac{dm(t)}{dt} &= [(1 - c)r(t) - \delta]m(t) + \mu r(t)w(t),
 \end{aligned} \tag{3}$$

131 where  $r(t) = \frac{\beta_w p_w}{c_v} T(t)$  is the replication rate of cells infected by wild-type virus, and  $c = 1 - \frac{\beta_m}{\beta_w}$  is  
 132 the cost of the escape mutation defined as a selection coefficient. The frequency of the escape variant  
 133 in the whole population is given by  $f(t) = \frac{m(t)}{w(t)+m(t)}$ . This is perhaps the simplest model for a viral  
 134 escape from a single CTL response. This is denoted as **model 1** in the paper.

## 135 2.3 Models of viral escapes from multiple CTL responses

136 Mathematical model given in eqn. (3) tracks changes in densities of wild-type virus and a single  
137 variant that has escaped recognition from a single epitope-specific CTL response. In acute HIV  
138 infection, the virus can escape from recognition of multiple CTL responses, which are specific to  
139 several viral epitopes [20, 47]. Several models have been developed to describe the dynamics of  
140 escapes from multiple CTL responses (e.g., [16, 17, 48]). Our model is an extension of previous  
141 models [16, 17] incorporating mutations from wild-type virus to different viral escapes. In contrast  
142 with previous studies in our analyses here we used experimentally measured time courses of different  
143 CTL responses [31].

144 To track the dynamics of viral escape from multiple responses, we assume that there are in total  
145  $n$  CTL responses that control viral growth, and virus can potentially escape from all  $n$  responses. We  
146 use  $m_{\mathbf{i}}$  to denote the density of variants where  $\mathbf{i}$  is a vector  $\mathbf{i} = (i_1, i_2, \dots, i_n)$  denoting the positions  
147 of  $n$  epitopes, and we define  $i_j = 0$  if there is no mutation in the  $j^{\text{th}}$  CTL epitope and  $i_j = 1$  if there  
148 is a mutation leading to an escape from the  $j^{\text{th}}$  ( $1 \leq j \leq n$ ) CTL response. We denote the set of  
149 escape variant as  $I$ , that is  $\mathbf{i} \in I$ . The wild-type variant is then denoted as  $(0, 0, \dots, 0)$ .

150 For our analysis, we neglect recombination and backward mutation from mutant to wild-type.  
151 We use  $k_i$ ,  $c_i$  and  $\mu_i$  to denote killing rate due to  $i^{\text{th}}$  CTL response, cost of escape mutation from  
152 the  $i^{\text{th}}$  CTL response and mutation rate for the  $i^{\text{th}}$  epitope, respectively. Due to a small rate of  
153 double mutation [34], we assume that escape virus is generated with only one mutation in a single  
154 generation. That is for two escape variants  $m_{\mathbf{i}} = m_{(i_1, i_2, \dots, i_n)}$  and  $m_{\mathbf{j}} = m_{(j_1, j_2, \dots, j_n)}$ , we define the  
155 mutation rate  $M_{\mathbf{i}, \mathbf{j}}$  from  $m_{\mathbf{i}}$  to  $m_{\mathbf{j}}$  as  $\mu_k$ , if and only if  $m_{\mathbf{j}}$  has only one more mutation at position  
156  $k$  than  $m_{\mathbf{i}}$  and all other positions are exactly same. For example, when there are 3 CTL responses,  
157 the mutation rate from  $m_{(1,0,0)}$  to  $m_{(1,1,0)}$  is  $\mu_2$ , and the mutation rate from  $m_{(0,0,0)}$  to  $m_{(1,0,1)}$  is 0.  
158 Assuming multiplicative fitness (detailed deviation is given in Section S2 in Supplement), that is, the  
159 fitness cost of a variant  $\mathbf{i} = (i_1, i_2, \dots, i_n)$  is  $C_{\mathbf{i}} = 1 - \prod_{j=1}^n (1 - c_j i_j)$ . The death rate of the escape  
160 variant  $\mathbf{i} = (i_1, i_2, \dots, i_n)$  due to remaining CTL responses is given by  $K_{\mathbf{i}} = \sum_{j=1}^n k_j (1 - i_j)$ , where we  
161 assume that killing of infected cells by different CTL responses is additive.

162 Similar to eqn. (3), the dynamics of the wild-type and escape variants are given by

$$\frac{dm_{\mathbf{i}}(t)}{dt} = [r(1 - C_{\mathbf{i}})(1 - \sum_{\mathbf{j} \in I} M_{\mathbf{i}, \mathbf{j}}) - K_{\mathbf{i}} - \delta]m_{\mathbf{i}}(t) + \sum_{\mathbf{j} \in I} r(1 - C_{\mathbf{j}})M_{\mathbf{j}, \mathbf{i}}m_{\mathbf{j}}(t), \mathbf{i} \in I. \quad (4)$$

163 We define  $M(t) = \sum_{\mathbf{i} \in I} m_{\mathbf{i}}$  as the total density of all variants in the population, and  $f_j(t)$   
164 ( $j = 1, \dots, n$ ) is the fraction of viral variants that have escaped recognition from the  $j^{\text{th}}$  CTL response.  
165 The frequency of a viral variant escaping from the  $j^{\text{th}}$  response is given by

$$f_j(t) = \sum_{\mathbf{i} \in J} m_{\mathbf{i}}(t)/M(t), \quad J = (i_1, \dots, i_j, \dots, i_n) \text{ with } i_j = 1. \quad (5)$$

166 Based on previous work [26, 28, 29], we assume that there are two alternative ways to generate  
167 escape mutants (Figure 1). The first way can be called “sequential” escape (**model 2**), that is  
168 escape mutants are generated sequentially along a defined path from wild-type viruses. This is likely  
169 to happen when the effective population size of HIV is small and when the rate of recombination is  
170 negligible. The second way can be described as “concurrent” escape (**model 3**), in which the virus  
171 can escape from  $n$  CTL responses simultaneously along multiple different pathways. This is likely to  
172 happen when the HIV effective population size is large. With  $n$  CTL responses, there are  $n$  escape



173 variants for “sequential” escape and  $2^n - 1$  escape variants for “concurrent” escape in addition to  
 174 the wild-type variant. For example, with  $n = 3$  CTL responses, for “sequential” escape there are 3  
 175 escape variants:  $m_{(1,0,0)}$ ,  $m_{(0,1,0)}$ , and  $m_{(0,0,1)}$  with  $m_{(0,0,0)}$  being the wild-type virus. For “concurrent”  
 176 escape there are 7 escape variants:  $m_{(1,0,0)}$ ,  $m_{(0,1,0)}$ ,  $m_{(0,0,1)}$ ,  $m_{(1,1,0)}$ ,  $m_{(1,0,1)}$ ,  $m_{(0,1,1)}$  and  $m_{(1,1,1)}$  with  
 177  $m_{(0,0,0)}$  being the wild-type virus (Figure 1). Detailed equations for both models with  $n = 3$  CTL  
 178 responses can be found in Supplement (Section S2). It is interesting to note that “sequential” escape  
 179 is a simplification of “concurrent” escape when the effective population size is small. Previous work  
 180 did not fully resolve whether CTL escapes in HIV infection occur sequentially or concurrently [26, 29];  
 181 most likely the type of escape varies by patient.

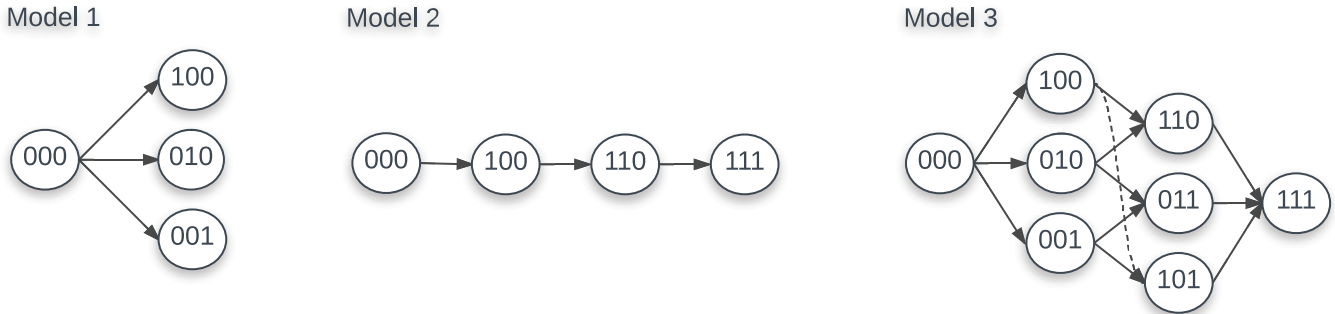

**Figure 1:** Escape paths for models 1, 2 & 3 with 3 CTL responses. For model 1, there are 3 escape variants:  $m_{(1,0,0)}$ ,  $m_{(0,1,0)}$  and  $m_{(0,0,1)}$ . For model 2 there are also 3 escape variants:  $m_{(1,0,0)}$ ,  $m_{(1,1,0)}$ , and  $m_{(1,1,1)}$ . For model 3 there are 7 escape variants:  $m_{(1,0,0)}$ ,  $m_{(0,1,0)}$ ,  $m_{(0,0,1)}$ ,  $m_{(1,1,0)}$ ,  $m_{(1,0,1)}$ ,  $m_{(0,1,1)}$  and  $m_{(1,1,1)}$ . In each case,  $m_{(0,0,0)}$  is the wild-type virus.

## 182 2.4 Models for CTL response

183 The killing rate  $k_i$  of the CTL response specific to the  $i^{th}$  epitope in all three models is composed  
 184 of two parts: the per-cell killing efficacy of CTLs ( $k'_i$ ) and the number of epitope-specific CTLs ( $E_i$ )  
 185 [15]. Previously the killing rates  $k_i$  were often set to a constant (e.g., [15, 17]), or were set to a certain  
 186 form  $k'_i g(E_i(t))$  where  $g_i(E_i(t))$  is a function of epitope-specific CTL responses  $E_i(t)$  (e.g., [1, 19]).  
 187 With the measured epitope-specific CTL response dynamics [20], we adopted two forms of killing rate  
 188 rate: constant  $k_i$  (termed as “constant response”) or time-dependent killing rate  $k'_i E_i(t)$  (termed as  
 189 “interpolated/fitted response”). We used the “mass-action” killing term to describe effect of CTLs on  
 190 virus dynamics because it is the simplest form, it involves minimum parameters, and it is supported  
 191 by some experimental data [14].

192 Based on the available time course information of epitope-specific T cell response  $E_i(t)$ , we used  
 193 the first-order interpolation function (termed as “interpolated response”) or the fitted response func-  
 194 tion (termed as “fitted response”) by the  $T_{on}$ - $T_{off}$  model [10] to quantify the kinetics of HIV-specific  
 195 CTL responses. The  $T_{on}$ - $T_{off}$  model assumes that the response starts with  $E_0$  epitope-specific CD8<sup>+</sup> T  
 196 cells that become activated at time  $T_{on}$ . Activated T cells start proliferating at a rate  $\rho$  and reach the  
 197 peak at time  $T_{off}$ . After the peak, epitopes-specific CD8<sup>+</sup> T cells decline at a rate  $\alpha$ . The dynamics  
 198 of the CD8<sup>+</sup> T cell response  $E(t)$  is given thus by the following differential equation:

$$\frac{dE}{dt} = \begin{cases} 0, & \text{if } t < T_{on}, \\ \rho E, & \text{if } T_{on} \leq t \leq T_{off}, \\ -\alpha E, & \text{if } t > T_{off}. \end{cases} \quad (6)$$

199 with  $E(0) = E_0$ . Here the “precursor frequency”  $E_0$  is a generalized recruitment parameter, which  
200 combines the true precursor frequency and the recruitment rate/time [9, 10]. Our recent work showed  
201 that this model (eqn. (6)) reasonably well describes kinetics of HIV-specific CTL responses in acute  
202 HIV infection (Yang and Ganusov (in review)). When fitting the model (eqn. (6)) to experimental  
203 data of CTL dynamics we changed all initial undetected response values from 0 to 1; the latter was  
204 the detection limit in the data.

## 205 **2.5 Statistics**

206 Previously, under the assumption that some mutants are present initially, researchers (e.g., [1, 15])  
207 fit a logistic model to data on viral escape kinetics by the method of nonlinear least squares [5]. In  
208 essence, this is a maximum likelihood method which assumes normally distributed residuals. While  
209 this standard statistical method provides reasonable parameter estimates it assumes equal weights to  
210 different data points independently of how many viral sequences were measured at every time point  
211 which is likely to be unrealistic for most experimental studies. Here we follow the method proposed  
212 recently [17] to use binomial distribution (and thus different weights for different measurements/time  
213 points) in the likelihood of the model given the escape data. For HIV escape from a single CTL  
214 response the log-likelihood function is given by

$$\mathcal{L} = \sum_{j=1}^{T_j} [a_j \ln(f(t_j)) + (N_j - a_j) \ln(1 - f(t_j))], \quad (7)$$

215 where  $a_j$  is the number of escape variant sequences in a sample of  $N_j$  sequences at the sample time  
216  $t_j$ ,  $T_j$  is the number of measured time points for a specific viral escape trajectory, and  $f(t_j)$  is the  
217 predicted frequency of a specific viral escape variant at time  $t_j$ . Model parameters were thus found  
218 by maximizing the log-likelihood function (eqn. (7)).

219 To discriminate between alternative models under different parameter constrains we used cor-  
220 rected Akaike information criterion (AIC) scores [8]. The model fit with the minimum AIC score  
221 among tested models was treated as the best model; however, a difference of less than 3 AIC units is  
222 generally viewed as not significant [8]. To test the statistical significance of the differences between  
223 parameters found by fitting different models, we used a bootstrap approach [11]. In this approach we  
224 resampled the data 1000 times using the `Random` routine in `Mathematica` assuming beta distribution  
225 for sequencing data [7], fitted models to bootstrap samples, and recorded all estimated parameters.  
226 For the same parameter, we use either paired and unpaired t-test to compare the means from different  
227 models.

228 Both fitness costs of escape mutations and the killing efficacy of the CTL response determine  
229 the kinetics of viral escape from T cells [2, 12, 15], and that viral escape (sequence) data in most  
230 cases are not sufficient to estimate both rates [15]. Therefore, in our analyses to avoid overfitting  
231 we set fitness cost of escape to zero  $c_i = 0$ . In all fits we assumed that the rate of virus replication  
232  $r = 1.5/\text{day}$  [40].

233 While multiple models may be able to describe accurately experimental data, some models may  
234 do so at biologically unreasonable parameters. For example, estimated rate of mutation at different  
235 epitopes may be unrealistically large. Thus, in our analysis we assume that mutation rates which  
236 are above  $10^{-3}$  are likely to be unrealistic given that currently estimated HIV mutation rate is about  
237  $3.2 \times 10^{-5}$  per bp per generation [34] and size of a CTL epitope is 8-10 amino acids ( $3 \times 10 \times 3.2 \times 10^{-5} \approx$



238  $10^{-3}$ ).

239 To fit the  $T_{\text{on}}-T_{\text{off}}$  model (eqn. (6)) to experimental data using non-linear least squares we log-  
240 transformed the model predictions and the data.

241 When interpolating CTL response kinetics, there was often not enough information on the starting  
242 point (day 0). In such situations we set the initial CTL density as 1 (the detection level for this data  
243 set) for simplicity. Other starting points (e.g., intersection point of the CTL response axis and the  
244 reverse extension line of the interpolation function) were also tested and led to similar results (not  
245 shown). This was largely due to the fact that in our models CTLs at low densities are not expected  
246 to exert large selective pressure on the virus population due to assumed mass-action killing term.

## 247 3 Results

### 248 3.1 Statistical model impacts estimation of the escape (killing) rate

249 Given virus evolution data we may be often interested in quantifying selecting pressures driving  
250 specific changes in the virus population. Following HIV-1 infection, the virus escapes from several  
251 cytotoxic T lymphocyte (CTL) responses [36], and multiple studies used mathematical models of  
252 various levels of complexity to estimate the predicted efficacy at which CTLs recognize and eliminate  
253 cells, infected with the wild-type (unescaped) virus [2, 12, 15–17, 26]. Many of these previous stud-  
254 ies estimated the rate of HIV escape from immunity using nonlinear least squares which explicitly  
255 assumes normal distribution of the deviations between model predictions and data [2, 12, 15, 16].  
256 However, the assumption of normally distributed residuals is likely to be violated for data when only  
257 a handful of viral genomes are sequences – which is common in many studies involving single genome  
258 amplification and sequencing techniques (SGA/S). We have recently proposed to use a likelihood  
259 approach which assumes virus genome sampling to follow a binomial distribution [17]. This bino-  
260 mial distribution-based likelihood approach showed to impact the estimates of the CTL killing rate  
261 (escape rate can be proportional to the killing rate under an assumption of constant CTL response)  
262 when compared to normal distribution-based likelihood approach (least squares) [17]. However, this  
263 previous comparison was done on data which were fairly sparse and comparison involved modifica-  
264 tions of data to allow for non-zero and non-one frequencies of the escape variant [2, 12], and thus, it  
265 remained unclear if estimates of escape rates are truly dependent on the statistical model for better  
266 sampled data.

267 Unfortunately, in our cohort of 17 patients [31] very few patients were sampled frequently enough  
268 to observe gradual accumulation of escape variants in the population (i.e., data with two sequential  
269 time points with mutant frequency in the range  $0 < f < 1$  were rare). For the analysis we, there-  
270 fore, used the escape data from two patients, CH131 and CH159, where CTL and HIV sequence  
271 measurements were sufficiently frequent to address our modeling questions. We fitted a simple math-  
272 ematical model describing escape of the virus from a single constant (non-changing) CTL response  
273 (eqn. (3)) to the data from one patient CH159 (Figure 2) assuming two different statistical models:  
274 with normally distributed residuals (least squares) or binomial distribution-based likelihood (eqn.  
275 (7)). Consistent with our previous observation we found that the type of statistical model impacts  
276 the estimate of the escape rate ( $k$  in Figure 2) with difference being nearly 2 fold ( $k = 0.27/\text{day}$  vs.  
277  $k = 0.51/\text{day}$ ). It is interesting to note that visually, the least squares method appear to describe the  
278 data better by accurately fitting the points with intermediate frequency of the escape variant in 20-30  
279 days after the symptoms (but missing the another intermediate data point (12, 0.08)). However, this

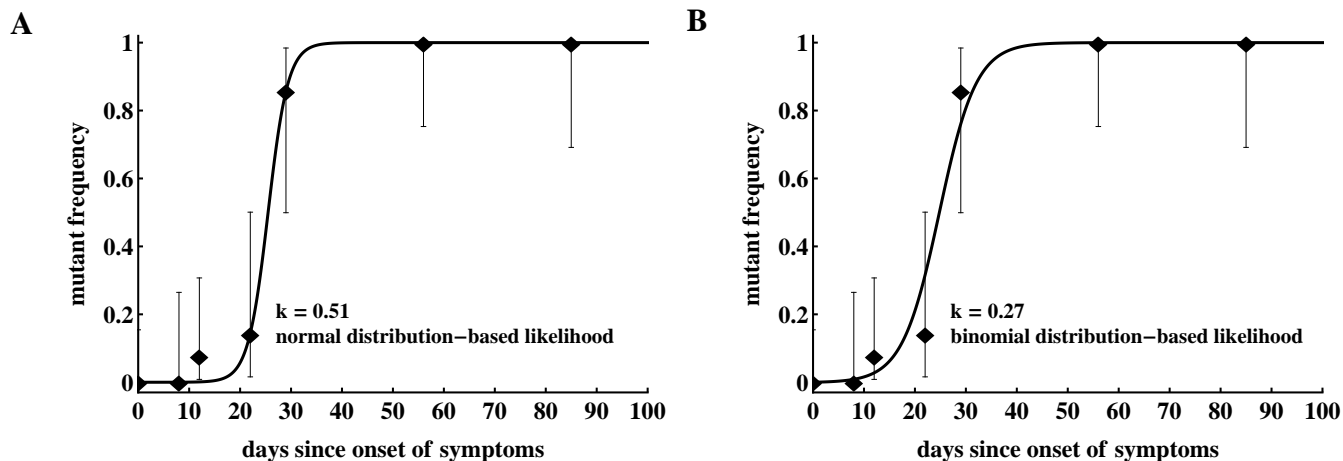

**Figure 2:** Statistical model has a strong impact on the estimated killing rate. We fit model in eqn. (7) to the same data for HIV escape in the protein region DREVLWKFDSSLARRHL of Nef (Nef 177-194) in patient CH159, assuming normal distribution-based likelihood (normally distributed residuals or nonlinear least squares, panel A) or binomial distribution-based likelihood method (panel B). Data are shown as dots and bars represent the 95% confidence intervals calculated using beta distribution (Jefferey’s intervals, [7]). The fitted parameters are  $\mu = 7.76 \times 10^{-7}$  and  $k = 0.51 \text{ day}^{-1}$  (A), or  $\mu = 2.00 \times 10^{-4}$  and  $k = 0.27 \text{ day}^{-1}$  (B).

visually better fit is not supported by the statistics: likelihood of the model for these data is -12.64  
or -10.53 for normal (Figure 2A) or binomial (Figure 2B) distribution, respectively (and AIC scores  
being 31.0 vs. 26.8, respectively). Interestingly, the main difference in the estimated escape rates  
was driven by just one data point ( $(t, f) = (12, 0.08)$ ); removing this data point from the data led to  
identical estimates of the escape rate,  $k = 0.51/\text{day}$ , from two statistical models (results not shown).  
This is not surprising because with this data point removed, the information on escape rate is only  
coming from two data points when the frequency of the escape variant is intermediate ( $0 < f < 1$ ).

As discussed before least squares may not allow to estimate escape rates, e.g. in cases when mutant  
frequency jumps from 0 to 1 between two subsequent time points unless data are modified [2, 12].  
Similarly, models assuming normally distributed residuals may not be able to fit other types of data,  
in which frequency of the mutant has an intermediate value ( $0 < f < 1$ ) at one time point only. In  
particular, in our analysis of another escape in patient CH159 (Rev GRPTEPVFPQLPPLRLC, see  
Figure 3) we could not obtain finite estimates of the escape rate using normally distributed residuals  
(results not shown). Rather, the model fits tended to describe accurately two data points ( $t = 22$  days  
and  $t = 29$  days) and ignore another data point ( $t = 56$  days) leading to extremely high predicted  
escape rates (results not shown). Interestingly, using binomial distribution-based likelihood allowed  
for an accurate fit of the model to data and the fit compromised between describing early and late  
data points (Figure 4A). The reason for the compromise is that a fit predicting fast escape and nearly  
100% escape variant by 56 days since symptoms is highly disfavored by the binomial distribution-  
based likelihood because some wild-type variants were still present at day 56 (thus the weight for  
missing this point by the model fit was very high in binomial distribution-based likelihood but not in  
the normal distribution-based likelihood). Taken together, these results suggest that the type of the  
statistical model used to estimate HIV escape rates influences the final estimates. Therefore, many  
previous studies on HIV escape assuming normally distributed residuals may need to be re-evaluated  
for the robustness of their conclusions.

## 3.2 CTL response kinetics do not improve description of the escape data

As CTL responses drive HIV escape from epitope-specific T cells, it is expected that the magnitude of the CTL response should naturally impact escape kinetics. Previous studies provided some evidence that the relative magnitude of a given CTL response in the total HIV-specific CTL response early in infection (% immunodominance) predicts the timing of viral escape [4, 31]. Immune response was also shown to impact escape of simian immunodeficiency virus (SIV) from T cell responses [32, 33, 35]. Immune response magnitude, and as a consequence, the overall CTL killing efficacy is important in determining both timing and speed of viral escape with the rate of viral escape being directly related to the immune response efficacy [15, 16]. In contrast, both initial mutant frequency, virus mutation rate, and CTL killing efficacy determine timing of viral escape [16]. Whether inclusion of the experimentally measured CTL dynamics impacts ability of mathematical models to accurately describe viral escape data has not been tested.

To test the benefits of using longitudinally measured CTL responses in describing viral escape data we considered several alternative models for the CTL dynamics and viral escape. Our model 1 describes the dynamics of viral escape from each CTL response independently. Models 2 & 3 describe escape from multiple CTL response that occurs sequentially or concurrently, respectively (see Materials and Methods for more details). CTL dynamics was either considered to be unimportant (i.e., killing rate  $k_i$  was set constant over time), or when killing rate was proportional to the experimentally measured CTL frequency ( $k'_i E_i(t)$ ), respectively. To describe CTL dynamics we either used the first order interpolation function or the  $T_{\text{on}}-T_{\text{off}}$  model (eqn. (6) and see Materials and Methods for more detail).

In patient CH159, four CTL responses were detected (Figure 3B) and three of these responses were escaped within nearly 4 years of infection. Interestingly, the response specific to Gag TPQDLNTML was dominant (Figure 3B), but the corresponding escape mutant Gag TPQDLNTMLNTVGGHQAA did not appear up to 1132 days since onset of symptoms (Figure 3A).

Patient CH159 had two escape mutants in regions Rev GRPTEPVFPQLPPLERLC (Rev 65-82) and Nef DREVLWKFDSSLARRHL (Nef 177-194) satisfying our selection criteria (Figure 3C). Despite a relative small magnitude of CTL responses specific to Rev65 and Nef177 early in infection (up to 29 days since onset of symptoms), escape mutants appeared early and their frequencies arose rapidly.

We fitted three alternative mathematical models for viral escape and three alternative models for the CTL dynamics to the data on viral escape (Figure 3C) using binomial distribution-based likelihood method (see Materials and Methods for more detail). Surprisingly, we found that the models 1 & 3 with a constant immune response described the data with best quality as judged by the AIC (or likelihood). Parameter estimates in the model 1 which assumes independent escape were nearly identical to the parameters in the model 3 which assumed concurrent escape (Figure 4 and Table 1). Importantly, adding experimentally measured CTL response dynamics (as interpolated function or by using parameterized  $T_{\text{on}} - T_{\text{off}}$  model) did not improve the quality of the model fit to escape data (Table 1). Even worse, for models 1 & 3 the fits with a fitted response were of lower quality as judged by the large increase in AIC (Table 1). Models that included an interpolated CTL response provided better fits than models with a fitted response (Table 1).

The exact reasons of why including experimentally measured CTL response dynamics led to worse fits of the escape data are unclear but perhaps rapid change in magnitude of CTL responses in this patient – if response directly impacts killing of infected cells – was simply not reflected in the kinetics of viral escape (Figure 4D&G). Specifically, CTL kinetics-driven escape would predict non-monotonic

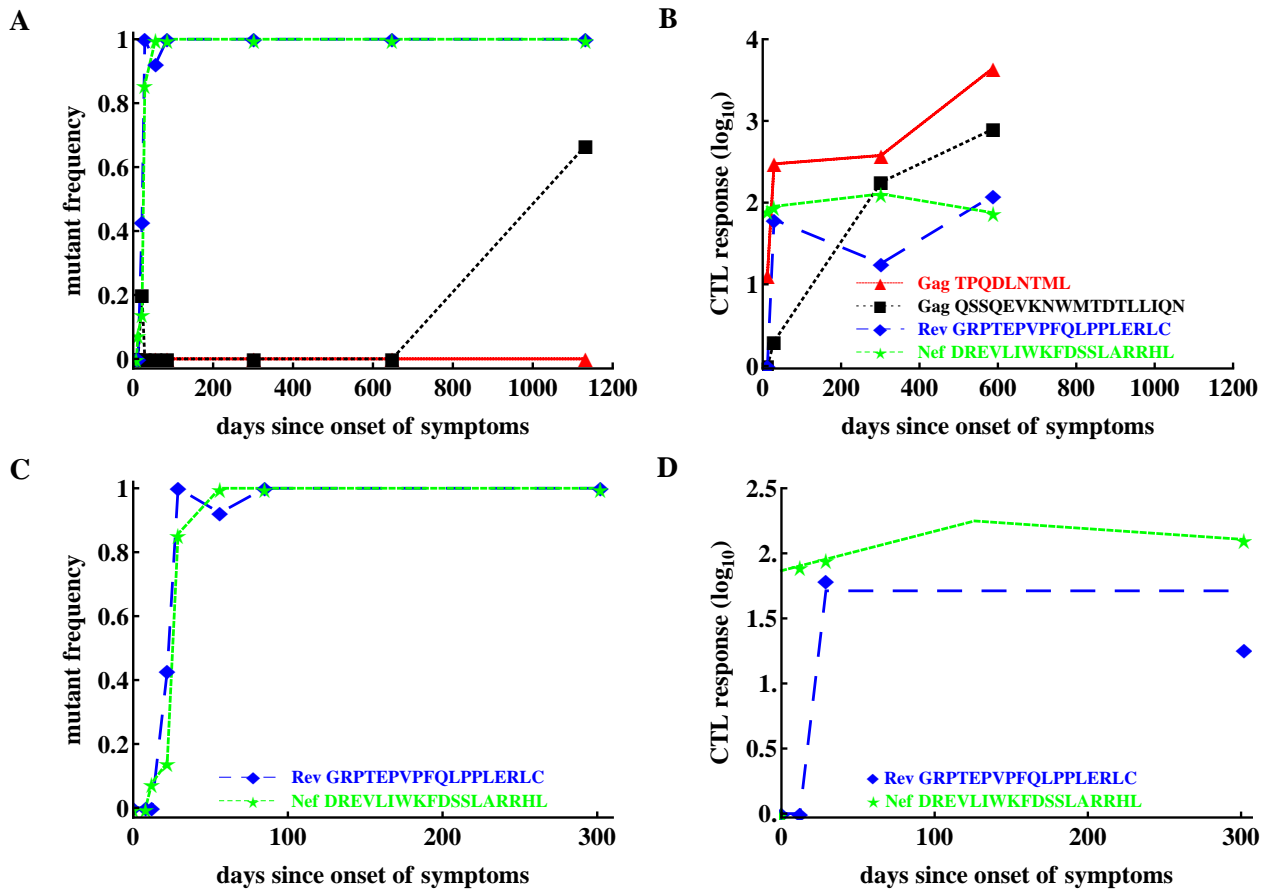

**Figure 3:** Basic dynamics of CTL response and HIV escape for patient CH159. Data are from a previous publication [31]; the data show four CTL responses in the patient (panel B) and frequencies of corresponding escape variants (panel A). Based on the selection criteria described in the Materials and in Methods we focused our analysis on CTL dynamics and escape in two regions: Rev GRPTEPVPFQLPPLERLC (65-82) and Nef DREVLIIWKFDSSLARRHL (177-194) shown for the first 200 days in panels C-D. Dashed lines in panel D are the prediction of the  $T_{\text{on}}-T_{\text{off}}$  model to these data with the following estimated parameters for the Rev-specific T cell response:  $E_0 = 1 \text{ IFN}_{\gamma+\text{SFC}}/10^6 \text{ PBMC}$ ,  $T_{\text{on}} = 12 \text{ day}$ ,  $T_{\text{off}} = 29 \text{ day}$ ,  $\rho = 0.23 \text{ day}^{-1}$ ,  $\alpha = 1.67 \times 10^{-6} \text{ day}^{-1}$ ; and for the Nef-specific T cell response:  $E_0 = 73.59 \text{ IFN}_{\gamma+\text{SFC}}/10^6 \text{ PBMC}$ ,  $T_{\text{on}} = 0 \text{ day}$ ,  $T_{\text{off}} = 126.05 \text{ day}$ ,  $\rho = 6.98 \times 10^{-3} \text{ day}^{-1}$ ,  $\alpha = 1.86 \times 10^{-3} \text{ day}^{-1}$ .

350 rise in the escape variant frequency which was not observed in the data, thus, favoring a model with  
 351 a constant killing rate by CTLs.

352 Interestingly, the model 2 fits of the data resulted in unphysiologically large estimates for the  
 353 mutation rate  $\mu_2$  (Table 1). As we elaborate later (see below) this failure of the model to describe  
 354 these data stems from the fact that escapes in the data occur nearly at the same time and assuming  
 355 that escapes are sequential led to an unrealistic mutation rate in the second epitope. This suggests  
 356 that the observed dynamics of viral escape in patient CH159 is not consistent with sequential escape.

357 Models 1 & 3 also predicted slightly higher than expected mutation rate  $\mu_1$  (bigger than  $10^{-3}$ ) for  
 358 the peptide Rev 65-82. Constraining this parameter to remain  $\mu_1 \leq 10^{-3}$  led to fits of significantly  
 359 lower quality (likelihood ratio test,  $p < 0.05$ ). Due to large length of the peptide, the overall mutation  
 360 rate in this region could indeed be slightly higher than our calculated high bound for the mutation  
 361 rate (see Materials and Methods for more detail). Furthermore, since peptide Rev 65-82 is the epitope  
 362 in which first escape occurred, it was possible that the high estimate of the mutation rate could be due

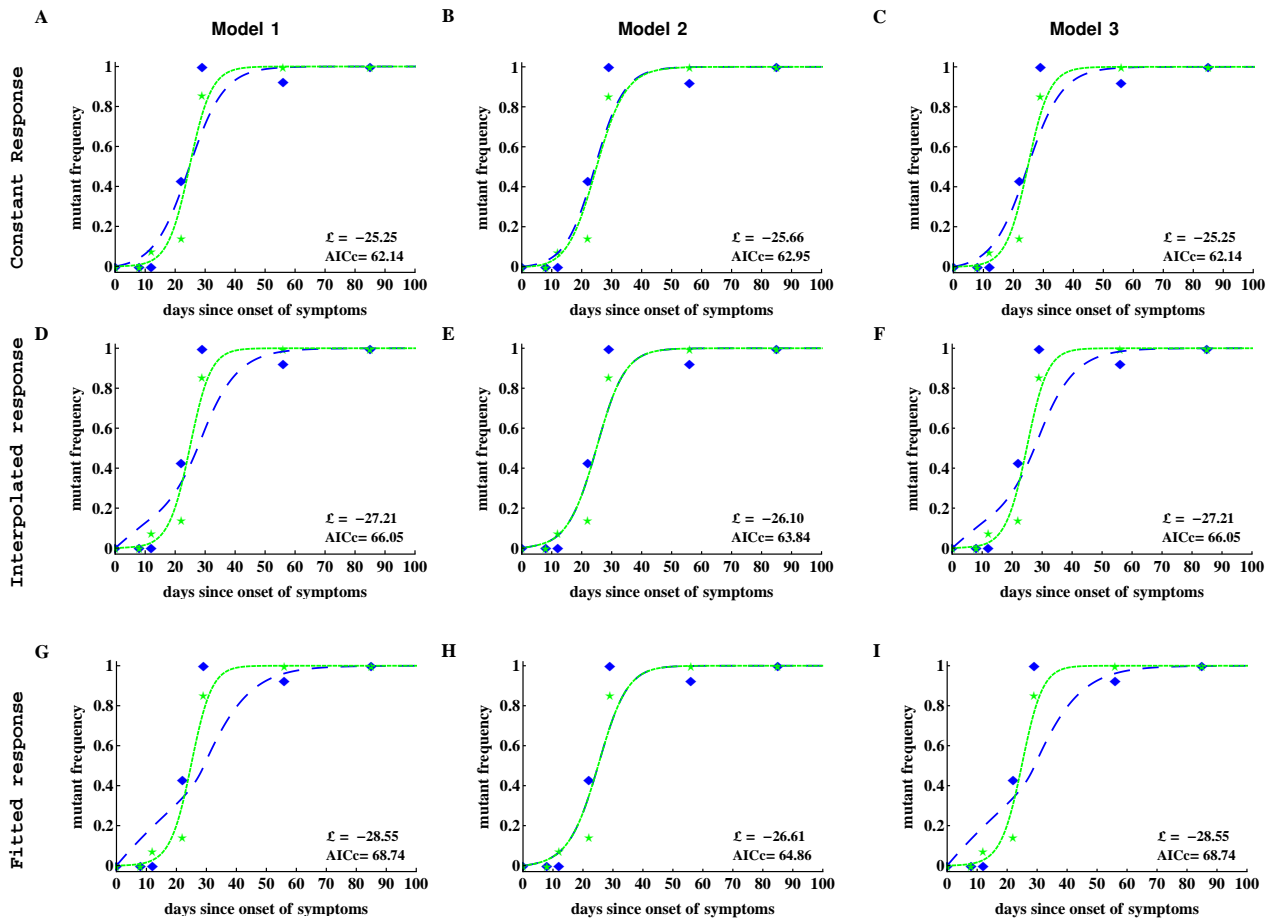

**Figure 4:** Including CTL response dynamics worsened model fits of HIV escape data in patient CH159. We fitted model 1 (independent escapes, eqn. (3)), model 2 (sequential escape, eqn. (S6)) and model 3 (concurrent escape, eqn. (S8)) to escape data in patient CH159 with different response inputs (constant, interpolated, or fitted response, see Materials and Methods for more detail). Adding direct time-dependent response (interpolated or fitted response) did not improve the quality of the model fit to data (see Table 1 for parameter estimates). Model 2 was not able to accurately describe these data for biologically reasonable mutation rates (see Table 1).

363 to late sampling of viral sequences. In these data sampling was done after patients were diagnosed  
 364 with infection, however, viral escape could have started earlier and for escapes starting earlier it may  
 365 be possible to describe the data with a lower mutation rate [17, 27].

366 Therefore, to test whether the timing of the start of the escape influences the estimate of the  
 367 mutation rate we did the following. We shifted the data for two escapes forward by adding some  
 368 initial zeroes to data and reverse extended the predicted CTL response curves. Then we refitted  
 369 model 1 & 3 to the data under the constrain  $\mu \leq 10^{-3}$ . We found shifting the data did not improve  
 370 the quality of the model fits as compared to unmodified data when CTL dynamics is explicitly taken  
 371 into account as interpolated or fitted response (results not shown). However, assuming a constant  
 372 response allowed to obtain lower, more physiological estimates of the mutation rate. These results  
 373 suggest that inability of the models which explicitly incorporate CTL dynamics to explain kinetics  
 374 of first escape with physiologically reasonable mutation rate is due to late appearance of the CTL  
 375 response. Indeed, escape can only accumulate when CTL response is present and extending the time  
 376 window for virus evolution but not having CTL response active will not significantly impact estimates



|                          | peptide                              | model 1                              |                                      | model 2                              |                                      | model 3                              |                                   |
|--------------------------|--------------------------------------|--------------------------------------|--------------------------------------|--------------------------------------|--------------------------------------|--------------------------------------|-----------------------------------|
|                          |                                      | mutation rate<br>( $\mu_i, i=1,2$ )  | killing rate<br>( $k_i, i=1,2$ )     | mutation rate<br>( $\mu_i, i=1,2$ )  | killing rate<br>( $k_i, i=1,2$ )     | mutation rate<br>( $\mu_i, i=1,2$ )  | killing rate<br>( $k_i, i=1,2$ )  |
| constant<br>response     | Rev 65-82                            | $1.68 \times 10^{-3}$                | 0.17                                 | $9.71 \times 10^{-4}$                | 0.20                                 | $1.68 \times 10^{-3}$                | 0.17                              |
|                          | Nef 177-194                          | $2.02 \times 10^{-4}$                | 0.27                                 | <i>0.11</i>                          | $6.29 \times 10^{-12}$               | $2.0 \times 10^{-4}$                 | 0.27                              |
|                          |                                      | $\mathcal{L} = -25.25, AICc = 62.14$ |                                      | $\mathcal{L} = -25.66, AICc = 62.95$ |                                      | $\mathcal{L} = -25.25, AICc = 62.14$ |                                   |
| interpolated<br>response |                                      | mutation rate<br>( $\mu_i, i=1,2$ )  | killing rate<br>( $k'_i, i=1,2$ )    | mutation rate<br>( $\mu_i, i=1,2$ )  | killing rate<br>( $k'_i, i=1,2$ )    | mutation rate<br>( $\mu_i, i=1,2$ )  | killing rate<br>( $k'_i, i=1,2$ ) |
|                          | Rev 65-82                            | $8.88 \times 10^{-3}$                | $2.12 \times 10^{-3}$                | $1.64 \times 10^{-3}$                | $2.03 \times 10^{-10}$               | $8.88 \times 10^{-3}$                | $2.12 \times 10^{-3}$             |
|                          | Nef 177-194                          | $4.94 \times 10^{-4}$                | $3.23 \times 10^{-3}$                | <i>697.77</i>                        | $2.32 \times 10^{-3}$                | $4.93 \times 10^{-4}$                | $3.23 \times 10^{-3}$             |
|                          | $\mathcal{L} = -27.21, AICc = 66.05$ |                                      | $\mathcal{L} = -26.10, AICc = 63.84$ |                                      | $\mathcal{L} = -27.21, AICc = 66.05$ |                                      |                                   |
| fitted<br>response       |                                      | mutation rate<br>( $\mu_i, i=1,2$ )  | killing rate<br>( $k'_i, i=1,2$ )    | mutation rate<br>( $\mu_i, i=1,2$ )  | killing rate<br>( $k'_i, i=1,2$ )    | mutation rate<br>( $\mu_i, i=1,2$ )  | killing rate<br>( $k'_i, i=1,2$ ) |
|                          | Rev 65-82                            | $1.43 \times 10^{-2}$                | $1.39 \times 10^{-3}$                | $1.13 \times 10^{-3}$                | $8.50 \times 10^{-18}$               | $1.43 \times 10^{-2}$                | $1.39 \times 10^{-3}$             |
|                          | Nef 177-194                          | $2.46 \times 10^{-4}$                | $3.25 \times 10^{-3}$                | <i>13004.84</i>                      | $2.29 \times 10^{-3}$                | $2.47 \times 10^{-4}$                | $3.25 \times 10^{-3}$             |
|                          | $\mathcal{L} = -29.68, AICc = 70.99$ |                                      | $\mathcal{L} = -26.61, AICc = 64.86$ |                                      | $\mathcal{L} = -29.68, AICc = 70.99$ |                                      |                                   |

**Table 1:** Parameters for the three models fitted to escape data from patient CH159. Fits of the model to data are shown in Figure 4.  $\mathcal{L}$  and AICc are the log-likelihood and the corrected Akaike information criterion value, respectively. In bold we show maximum  $\mathcal{L}$  and minimum AICc reached by the models 1 & 3 with constant response. There are some unrealistic mutation rates given by model 2 (much bigger than  $10^{-3}$ , highlighted as italic), and models 1& 3 also led to slightly unrealistic mutation rates at the peptide Rev 65-82 (slightly bigger than  $10^{-3}$ ). Units for  $k_i$  and  $k'_i$  are day $^{-1}$  and  $\mu_i$  is dimensionless (same for all tables below).

377 of the mutation rate.

378 Given our results for one patient we next sought to investigate whether our conclusions will remain  
379 robust when looking at data from another patient. Patient CH131 had 6 CTL responses and there  
380 was escape from at least 5 of these responses in 2 years since symptoms (Figure 5). One escape, Nef  
381 EEVGFPVKPQV (Nef 64-74), occurred very early in infection, and two escapes, Env RQGYSPLS-  
382 FQTLIPNPRG (Env 709-726) and Gag VKVIEEKAFSPEVIPMFT (Gag 156-173), occurred late  
383 (Figure 5). In this patient the pattern of escape followed the ranking of immunodominance of CTL  
384 responses [31]: Nef64-specific CTLs were dominant at symptoms and drove earlier escape, while Env  
385 709- and Gag156-specific CTLs arose later with escapes occurring later in infection (Figure 5A&B).  
386 However, there were apparently discrepancies such as two escapes in Tat epitopes (Tat DPWNH-  
387 PGSQPKTACNNCY, that is Tat 9-26 and Tat FQKKGLGISY, that is Tat 38-47) occurred at the  
388 same time while CTL responses specific to these different epitopes were of different sizes (Figure  
389 5A&B). Because escapes in these two Tat epitopes occurred rapidly and did not have two interme-  
390 diate measurements of the mutant frequency, our following analysis was only restricted to escapes in  
391 three CTL epitopes: Nef64, Env709, Gag156 (Figure 5C&D).

392 We thus fitted 3 different models of viral escape combined with 3 different models for the CTL  
393 dynamics to the data on viral escape (Figure 6). Importantly, as with the analysis of data from  
394 patient CH159 we found that including the data-driven CTL dynamics in the escape models did  
395 not improve the quality of the model fit to the escape data (Table 2). In contrast with the previous  
396 results, though, the assumption of the constant and time-variable killing efficacy (i.e., due to variation  
397 in the immune response magnitude) did not strongly impact the quality of the model fit as judged by  
398 the AIC or likelihood (Table 2). Importantly, however, models 1&3 gave nearly identical estimates  
399 of the CTL killing efficacy, suggesting that for data with good temporal resolution model estimates  
400 of the CTL killing efficacy (or by inference, escape rates) are not strongly dependent on the specific



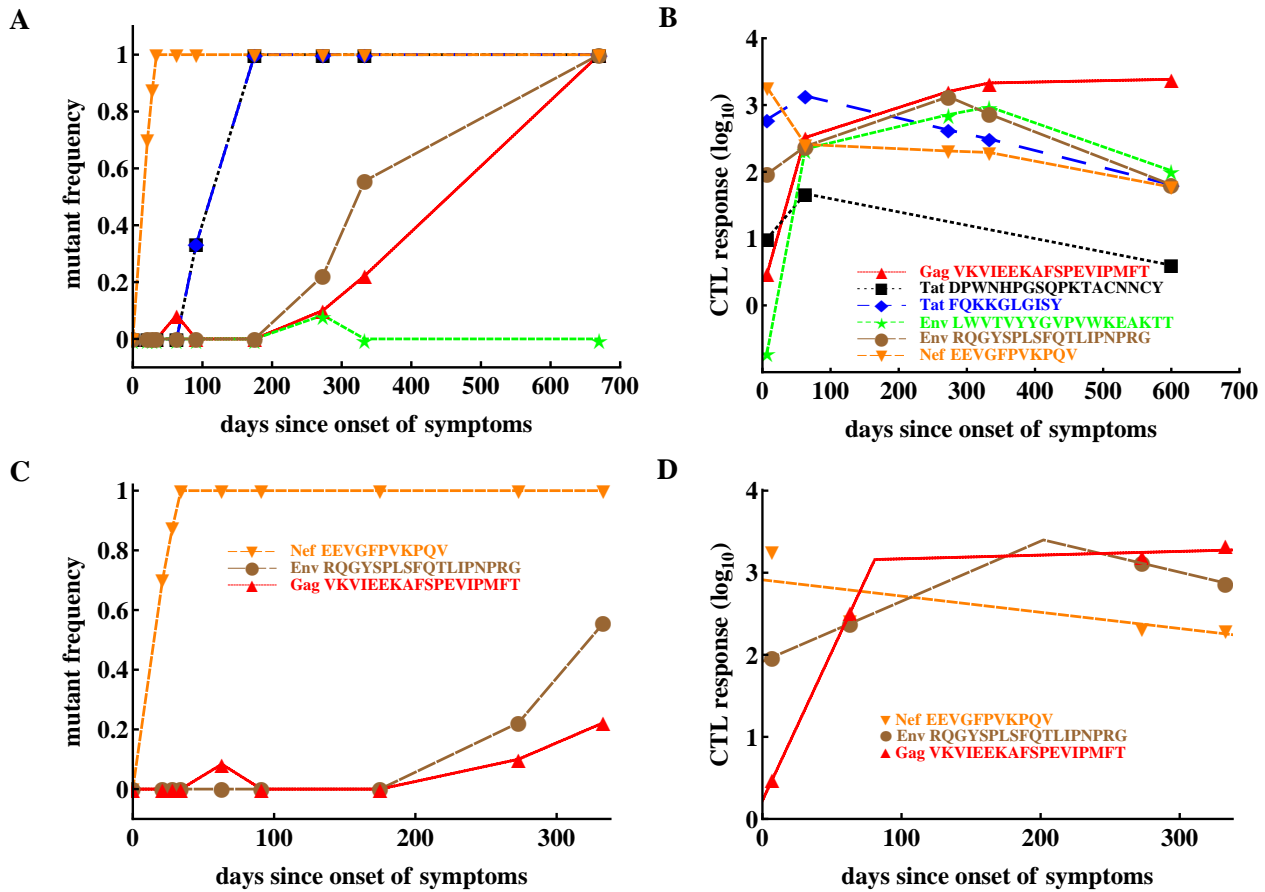

**Figure 5:** Basic dynamics of CTL response and HIV escape in patient CH131. Patient CH131 had 6 CTL responses (panel B) and 5 responses were escaped by 700 days since infection (panel A). Based on our selection criteria (see Materials and Methods) we focused our analysis on escape in three epitopes: Nef 64-74, Env 709-726 and Gag 156-173 (panel C) with the corresponding CTL dynamics (panel D). Dashed lines in panel D denote fits of the  $T_{\text{on}} - T_{\text{off}}$  model (eqn. (6)) to these data resulting in the following estimates for the model parameters for Nef-specific T cell responses:  $E_0 = 808.59 \text{ IFN}_{\gamma^+} \text{SFC}/10^6 \text{ PBMC}$ ,  $\alpha = 4.55 \times 10^{-3} \text{ day}^{-1}$ ; for Env-specific T cell responses:  $E_0 = 82.97 \text{ IFN}_{\gamma^+} \text{SFC}/10^6 \text{ PBMC}$ ,  $T_{\text{on}} = 0 \text{ day}$ ,  $T_{\text{off}} = 202.02 \text{ day}$ ,  $\rho = 0.017 \text{ day}^{-1}$ ,  $\alpha = 9.23 \times 10^{-3} \text{ day}^{-1}$ ; for Gag-specific T cell responses:  $E_0 = 1.67 \text{ IFN}_{\gamma^+} \text{SFC}/10^6 \text{ PBMC}$ ,  $T_{\text{on}} = 0 \text{ day}$ ,  $T_{\text{off}} = 80.76 \text{ day}$ ,  $\rho = 0.084 \text{ day}^{-1}$ ,  $\alpha = -1.04 \times 10^{-3} \text{ day}^{-1}$ .

401 mechanisms used to describe escape (independent vs. concurrent escape).

402 Extending the observation made with the patient CH159 data, we found that model assuming  
 403 sequential escape (model 2) could not accurately describe the dynamics of viral escape for biologi-  
 404 cally reasonable parameter values specifically for the third escape in Gag156 although this inability  
 405 was significant only for a constant killing efficacy (Table 2). Allowing time-dependent killing efficacy  
 406 resulted in small yet larger values for the mutation rate than that expected from basic calculations.  
 407 Forcing the mutation rate  $\mu_3$  to be constrained ( $\mu_3 \leq 10^{-3}$ ) significantly reduced the quality of the  
 408 model fit to data (likelihood ratio test,  $p \ll 0.001$ ). Furthermore, estimates for the CTL killing effica-  
 409 cy differed between model 2 and models 1&3 suggesting that model choice (sequential vs. concurrent)  
 410 may indeed influence estimates of the killing efficacy.

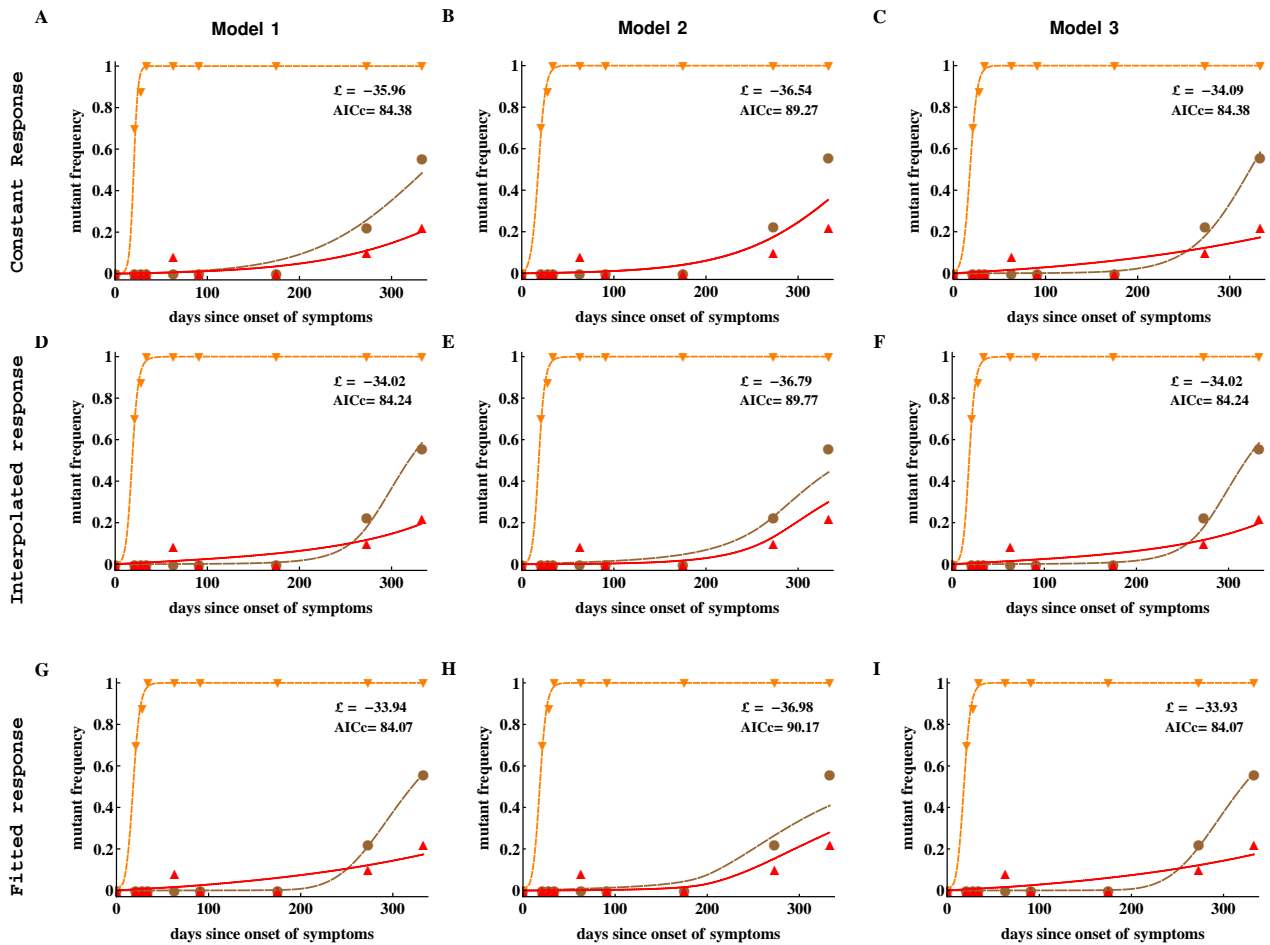

**Figure 6:** Including CTL response dynamics did not improve model fits of HIV escape data in patient CH131. We fitted model 1 (independent escapes), model 2 (sequential escape) and model 3 (concurrent escape) to escape data in patient CH131 with different CTL response inputs (constant, interpolated or fitted response). Adding data-derived time-dependent CTL response (interpolated or fitted response) does not improve the fitting results in most cases (Table 2). Notably, model 2 was unable to accurately describe late escape for biologically reasonable mutation rate  $\mu_3$ . Model parameters providing the best fit are given in Table 2.

### 3.3 No difference in predicted killing efficacy of CTLs, specific to different epitopes

Our analyses so far demonstrated that several different mathematical models were capable of accurately describing the escape data, but this ability was dependent on the specific pathway of how escape mutants were generated and the assumption on whether data-driven CTL dynamics was included in the model. In cases, when a model was able to accurately describe the data, we generally observed different estimates for the parameters for HIV escape in different epitopes; for example, for the data in patient CH131 estimated CTL killing rate in the model 1 (independent escapes) with interpolated response different nearly 100 fold between  $k'_1$  and  $k'_3$  (Table 2). Knowing which immune responses may be more efficient on a per cell basis in killing virus-infected cells may be beneficial for inducing such responses by vaccination. We therefore investigated how robust these differences in estimated per capita killing rates are. For that we fitted mathematical models assuming equal

|                          | peptide                              | model 1                                   |                                         | model 2                                   |                                         | model 3                                   |                                         |
|--------------------------|--------------------------------------|-------------------------------------------|-----------------------------------------|-------------------------------------------|-----------------------------------------|-------------------------------------------|-----------------------------------------|
|                          |                                      | mutation rate<br>( $\mu_i, i = 1, 2, 3$ ) | killing rate<br>( $k_i, i = 1, 2, 3$ )  | mutation rate<br>( $\mu_i, i = 1, 2, 3$ ) | killing rate<br>( $k_i, i = 1, 2, 3$ )  | mutation rate<br>( $\mu_i, i = 1, 2, 3$ ) | killing rate<br>( $k_i, i = 1, 2, 3$ )  |
| constant<br>response     | Nef 64-74                            | $1.75 \times 10^{-3}$                     | 0.25                                    | $1.72 \times 10^{-3}$                     | 0.25                                    | $1.78 \times 10^{-3}$                     | 0.25                                    |
|                          | Env 709-726                          | $1.03 \times 10^{-7}$                     | 0.031                                   | $3.18 \times 10^{-5}$                     | $5.45 \times 10^{-3}$                   | $9.91 \times 10^{-7}$                     | 0.031                                   |
|                          | Gag 156-173                          | $1.49 \times 10^{-4}$                     | $5.16 \times 10^{-3}$                   | <i>4.33780.63</i>                         | 0.010                                   | $1.49 \times 10^{-4}$                     | $5.19 \times 10^{-3}$                   |
|                          |                                      | $\mathcal{L} = -34.09, AICc = 84.38$      |                                         | $\mathcal{L} = -36.54, AICc = 89.27$      |                                         | $\mathcal{L} = -34.09, AICc = 84.38$      |                                         |
| interpolated<br>response |                                      | mutation rate<br>( $\mu_i, i = 1, 2, 3$ ) | killing rate<br>( $k'_i, i = 1, 2, 3$ ) | mutation rate<br>( $\mu_i, i = 1, 2, 3$ ) | killing rate<br>( $k'_i, i = 1, 2, 3$ ) | mutation rate<br>( $\mu_i, i = 1, 2, 3$ ) | killing rate<br>( $k'_i, i = 1, 2, 3$ ) |
|                          | Nef 64-74                            | $4.33 \times 10^{-4}$                     | $1.97 \times 10^{-4}$                   | $3.95 \times 10^{-4}$                     | $2.00 \times 10^{-4}$                   | $4.30 \times 10^{-4}$                     | $1.96 \times 10^{-4}$                   |
|                          | Env 709-726                          | $7.07 \times 10^{-6}$                     | $3.01 \times 10^{-5}$                   | $8.76 \times 10^{-5}$                     | $1.56 \times 10^{-5}$                   | $7.17 \times 10^{-6}$                     | $3.00 \times 10^{-5}$                   |
|                          | Gag 156-173                          | $1.56 \times 10^{-4}$                     | $4.59 \times 10^{-6}$                   | <i>3.33</i>                               | $7.48 \times 10^{-14}$                  | $1.55 \times 10^{-4}$                     | $4.61 \times 10^{-6}$                   |
|                          | $\mathcal{L} = -34.02, AICc = 84.24$ |                                           | $\mathcal{L} = -36.79, AICc = 89.77$    |                                           | $\mathcal{L} = -34.02, AICc = 84.24$    |                                           |                                         |
| fitted<br>response       |                                      | mutation rate<br>( $\mu_i, i = 1, 2, 3$ ) | killing rate<br>( $k'_i, i = 1, 2, 3$ ) | mutation rate<br>( $\mu_i, i = 1, 2, 3$ ) | killing rate<br>( $k'_i, i = 1, 2, 3$ ) | mutation rate<br>( $\mu_i, i = 1, 2, 3$ ) | killing rate<br>( $k'_i, i = 1, 2, 3$ ) |
|                          | Nef 64-74                            | <i><math>3.25 \times 10^{-3}</math></i>   | $3.38 \times 10^{-4}$                   | <i><math>2.99 \times 10^{-3}</math></i>   | $3.46 \times 10^{-4}$                   | <i><math>3.16 \times 10^{-3}</math></i>   | $3.41 \times 10^{-4}$                   |
|                          | Env 709-726                          | $1.38 \times 10^{-6}$                     | $2.59 \times 10^{-5}$                   | $8.90 \times 10^{-5}$                     | $1.05 \times 10^{-5}$                   | $1.12 \times 10^{-6}$                     | $2.66 \times 10^{-5}$                   |
|                          | Gag 156-173                          | $1.73 \times 10^{-4}$                     | $2.82 \times 10^{-6}$                   | <i><math>3.41 \times 10^{-3}</math></i>   | $6.90 \times 10^{-14}$                  | $1.73 \times 10^{-4}$                     | $2.83 \times 10^{-6}$                   |
|                          | $\mathcal{L} = -33.94, AICc = 84.07$ |                                           | $\mathcal{L} = -36.98, AICc = 90.17$    |                                           | $\mathcal{L} = -33.94, AICc = 84.07$    |                                           |                                         |

**Table 2:** Parameters estimated by fitting different models of viral escape to escape data in patient CH131 assuming constant killing rates  $k_i$  (panels A-C), or time-varying killing rates due to interpolated CTL response (panels D-E) or CTL response in the  $T_{\text{on}} - T_{\text{off}}$  model (panels G-I). Alternative models assume independent escape (model 1, panels A, D, & G), sequential escape (model 2, panels B, E, & H), or concurrent escape (model 3, panels C, F, & I). Fits of models 1 & 3 gave very close parameter values, but there were some unrealistic parameter values (italicized in the table) from fits of the model 2.  $\mathcal{L}$  and AICc give the log-likelihood score and the correlated Akaike information criterion value, respectively. Models 1 & 3 fit almost equally with three types of response inputs and the lowest  $\mathcal{L}$  and AICc are shown in bold.

423 killing efficacies to the data on escape. As expected, reducing the number of fitted parameters led  
 424 to fits of lower quality (as judged by the log-likelihood); however, this reduction in complexity of  
 425 the model was favored by the AIC and in most cases by the likelihood ratio test (Tables S2 and S4  
 426 in Supplement). Visually, the reduction in the quality of the model fit to data was also relatively  
 427 small (Figures S2 and S4 in Supplement). Thus, for these data we found no strong evidence in the  
 428 difference in the estimated per capita killing efficacy of the CTL response specific to different viral  
 429 epitopes.

### 3.4 Identifying conditions when the model 2 (sequential escapes) fails

431 In analysis of data from both patients we found that model 2, describing sequential escape from  
 432 CTL responses, was not able to accurately describe experimental data for biologically reasonable  
 433 parameter values; these model fits predicted extremely high mutation rates (e.g., see Tables 1 and 2).  
 434 Additional analyses demonstrated that fitting the models with constrained mutation rates,  $\mu_i \leq 10^{-3}$ ,  
 435 led to fits of significantly lower quality (based on increased AIC, results not shown).

436 A closer look at the experimental data for which model 2 provided unreasonably high mutation  
 437 rates revealed that the trajectories of two subsequent escapes in the model 2 were too close to each  
 438 other which naturally required a high mutation rate from one variant to another. Therefore, only  
 439 when trajectories are separated in time mutation rate  $\mu_2$  is expected to be biologically reasonable.  
 440 Indeed, by simulating virus dynamics using model for sequential escapes by varying model parameters  
 441 we found that CTL killing rate has the major impact on the time delay between two escapes (Figure  
 442 7). This analysis thus suggested that for the model 2 (sequential escape) to be consistent with the

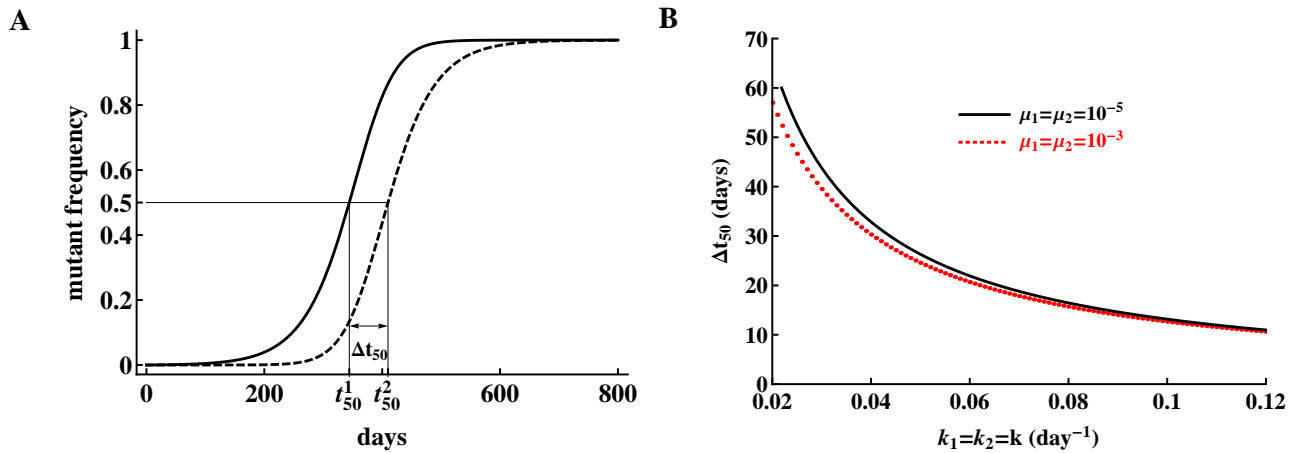

**Figure 7:** Model, assuming sequential escape (model 2), can be consistent with escape data when the trajectories for two sequential viral escape are separated in time. We illustrate that separation of trajectories by  $\Delta t_{50} = 409.8 - 344.2 \simeq 66$  days is sufficient for the mutation rate to be realistically small (panel A). Here  $t_{50}^i$  is the time by which the  $i^{\text{th}}$  variant reaches 50% of the viral population, so  $\Delta t_{50} = t_{50}^2 - t_{50}^1$ . Parameters used in simulations are  $\mu_1 = \mu_2 = 10^{-5}$ ,  $k_1 = k_2 = 0.02$  day $^{-1}$ ,  $r = 1.5$  day $^{-1}$ ,  $\delta = 1$  day $^{-1}$ . The distance between trajectories needed for small predicted mutation rates is reduced for higher CTL killing rates (panel B) and the time is only weakly dependent on the mutation rate assumed in simulations.

443 data, escapes from 2 responses must be separated in time by about 20-50 days.

## 444 4 Discussion

445 CTL responses play a major role in HIV within-host evolution [36, 37]. Recent studies suggested that  
 446 a relative magnitude of the CTL response (relative immunodominance) plays an important role in  
 447 determining the time of viral escape from T cell responses [4, 31]. These previous studies, however,  
 448 only utilized a maximum value of the CTL response early in infection, in general within 50 days since  
 449 the onset of symptoms, and thus impact of the kinetics of CTL response on the rate of virus escape  
 450 remained undetermined. Furthermore, the pathways of HIV escape from CTL responses were not  
 451 fully resolved as escapes occurring sequentially and concurrently have been proposed [26, 29, 39], and  
 452 several previous studies assumed that escapes occur independently from each other [2, 12, 16]. Here  
 453 by using experimental data on evolution of HIV sequences from acute infection into chronic phase  
 454 and temporally resolved dynamics of HIV-specific CTL responses we tested the hypothesis that CTL  
 455 dynamics plays an important role in virus escape.

456 Perhaps in contrast with our initial expectations (e.g., due to [4, 31]), we found that including  
 457 experimentally measured dynamics of epitope-specific CTL responses did not led to a better descrip-  
 458 tion of the kinetics of viral escape from T cells (e.g., in patient CH131, Table 2), or even reduced  
 459 the quality of the model for viral escape fit to data (e.g., in patient CH159, Table 1). This was  
 460 not because we assumed that killing of virus-infected cells was dependent on the absolute magni-  
 461 tude of epitope-specific CTL responses; assuming frequency-dependent killing, that is, when killing  
 462 of infected cells expressing  $i^{\text{th}}$  epitope was given by  $k_i E_i(t) / \sum_{j=1}^n E_j(t)$  ( $1 \leq i \leq n$ ), led to similar  
 463 conclusions (results not shown). Because previous work suggested that kinetics of escape was in-  
 464 dependent of the specific mechanism of how CTLs suppress wild-type virus (e.g., killing of infected  
 465 cells or virus production by infected cells) [15], we did not investigate non-lytic control of HIV by T

466 cells. It is interesting that the lack of correlation between the rate of viral escape and CTL response  
467 magnitude was highlighted previously [16].

468 Reasons of why a model with time-variable CTL response did not describe experimental data  
469 better than a model with a constant response remain unclear but several hypotheses could be gen-  
470 erated. First, frequency of sampling of the viral sequences may not be high enough to detect change  
471 in the speed at which mutant viruses accumulate in the population. Indeed, in mathematical mod-  
472 els CTL dynamics has a direct impact on the rate of escape (e.g., see eqn. (3)) and the observed  
473 changes in CTL densities may not be reflected in escape data if data sampling is infrequent. Second,  
474 virus sequence data could simply be noisy. Because only handful of viral sequences were analyzed  
475 by the SGA/S, measurements of frequencies of viral variants have in general large expected error  
476 (e.g., Figure 2). Third, CTL dynamics in the blood may not reflect CTL dynamics in tissues such as  
477 secondary lymphoid organs (lymph nodes and spleen). While it is well known that T cells recirculate  
478 in the body [13], how quickly CTLs in the tissues migrate into the blood and then back to the tissues  
479 during HIV infection is not known. Finally, it is possible that the measured CTL responses were  
480 not the drivers of escape. While the ability of CTLs to recognize the wild-type virus and inability  
481 of the same CTLs to recognize mutant viruses is generally interpreted as evidence that these CTLs  
482 drove viral escape, such observations are correlational in nature, and thus can not fully establish the  
483 causality of escape, at least in humans.

484 Our results may be interpreted as contradictory to several previous studies that found a strong  
485 correlation between the time of viral escape (time when a escape variant reaches frequency of 50% in  
486 the viral population) and a relative magnitude of CTL response (relative or “vertical” immunodom-  
487 inance) [4, 31]. However, our studies are not directly compatible because this previous work focused  
488 on the timing of escape while we primarily focused on the rate of viral escape. These two parameters  
489 are differently impacted by the CTL response [16] and may have different clinical importance. In our  
490 simple mathematical model (e.g., eqn. (3)) CTL response magnitude is expected to directly impact  
491 the rate at which an escape mutant accumulates in the population, independently of when this es-  
492 cape may occur. In contrast, timing of viral escape also depends on the mutation rate. Biologically,  
493 however, timing of escape may be more important than the rate because it may be more beneficial  
494 to the patient if viral escape occurs 5 years after infection but rapidly as compared to slow escape in  
495 just 1 year. This conjecture clearly depends on the premise that HIV escapes from CTL responses  
496 are detrimental to patients.

497 In our analysis we generally found that for well sampled data the pathway of generation of escape  
498 mutants played a minor role in predicting overall CTL killing efficacy; assuming escapes that occur  
499 independently (model 1) or concurrently (model 3) gave nearly identical estimates of the CTL killing  
500 efficacy (e.g., Tables 1 and 2). In contrast, the model assuming sequential escape (model 2) often  
501 failed to accurately explain experimental data; this was due to some escapes co-occurring at nearly the  
502 same time which obviously violated the model assumption of sequential escape. This inability of the  
503 sequential escape model to describe the data may be the result of the way we compared models to data:  
504 by using deterministic model approach and by ignoring recombination. Using deterministic model  
505 may be justified because in acute infection the effective population size of HIV may be sufficiently  
506 large and ignoring recombination may again be appropriate because very few cells in HIV infection  
507 are generally infected by 2 or more viruses [24, 25]. However, further work is needed to demonstrate  
508 whether our conclusions regarding inability of sequential escape model to accurately explain some  
509 escape data is due to some of the assumptions made in the model by running stochastic simulations  
510 and by allowing some degree of recombination.

511 Many of our model fits predicted a high mutation rate for the first epitope to be escaped by the

512 virus (e.g., Table 2). This model prediction could not be changed by shifting the experimental data  
513 to allow for more time to generate escape mutant; in part, this test failed because in the absence of  
514 epitope-specific T cells escape variants accumulate rather slowly mainly driven by mutations. It may  
515 indicate that immune pressure on the virus population starts much earlier than it is reflected in the  
516 blood, echoing our concerns of whether CTL dynamics in the blood is an accurate reflection of T cell  
517 response in lymphoid tissues. Currently it is believed that lymphoid tissues and not the blood are  
518 the major places of interactions between the virus and CTLs [22, 30].

519 Our analysis further highlights the importance of choosing the appropriate statistical model for  
520 the analysis of the escape data – assuming normally-distributed residuals, and therefore, using least  
521 squares approach, may not be appropriate for some escape data with very few sequences analyzed.  
522 Importantly, we confirm that the type of statistical model has an impact on the estimate of the  
523 escape rate [17].

524 We found that experimental data on HIV escape can be explained well if we assume identical per  
525 capita killing efficacy of CTLs, specific to different viral epitopes. This suggests that individual per  
526 capita killing rates not accurately estimated from these data. While it is possible that this result  
527 was the consequence of assuming additive killing of virus-infected cells by different CTL responses,  
528 we currently do not have any *in vivo* data to support more complex killing terms.

529 Overall, analyses of data from two patients suggested that models assuming independent escape  
530 of HIV from different CTL responses (model 1) or models assuming concurrent escape from mul-  
531 tiple CTL responses (model 3) fit the data well and provide very similar (often nearly identical)  
532 estimates for the killing efficacy of CTL response. Thus, for well sampled data assumption of in-  
533 dependent escapes may be sufficient to accurately estimate HIV escape rates. Also the model with  
534 data-driven time-dependent CTL response (interpolated or fitted response input) did not improve  
535 the quality of the model fit to data, so at present it appears to be unnecessary to incorporate the  
536 experimentally-measured CTL response dynamics in the model describing viral escapes. Our analysis  
537 thus demonstrates how mathematical modeling may help to quantify HIV evolution in presence of  
538 CTL responses and to highlight potential limitations with experimental measurements.

## 539 **Conflict of Interest Statement**

540 The authors declare that the research was conducted in the absence of any commercial or financial  
541 relationships that could be construed as a potential conflict of interest.

## 542 **Author Contributions**

543 YY and VG designed the study. YY performed the simulations. YY and VG contributed to analysis,  
544 interpolation of data and simulation results. YY and VG wrote the paper.

## 545 **Funding**

546 This work was supported by the American Heart Association (AHA) grant to VG.



## 547 Acknowledgments

548 The authors would like to thank Dr. Nilu Goonetilleke and the Center for HIV/AIDS Vaccine  
549 Immunology (CHAVI) for data access.

## 550 References

- 551 1. Althaus, C. L. and De Boer, R. J. (2008). Dynamics of immune escape during HIV/SIV infection.  
552 *PLoS Computational Biology* 4, e1000103. doi:10.1371/journal.pcbi.1000103
- 553 2. Asquith, B., Edwards, C. T. T., Lipsitch, M., and McLean, A. R. (2006). Inefficient cytotoxic  
554 T lymphocyte-mediated killing of HIV-1-infected cells in vivo. *PLoS Biology* 4, e90. doi:  
555 10.1371/journal.pbio.0040090
- 556 3. Barouch, D. H., Kunstman, J., Kuroda, M. J., Schmitz, J. E., Santra, S., Peyerl, F. W., et al.  
557 (2002). Eventual AIDS vaccine failure in a rhesus monkey by viral escape from cytotoxic T  
558 lymphocytes. *Nature* 415, 335–339. doi:10.1038/415335a
- 559 4. Barton, J. P., Goonetilleke, N., Butler, T. C., Walker, B. D., McMichael, A. J., and Chakraborty,  
560 A. K. (2016). Relative rate and location of intra-host HIV evolution to evade cellular immunity  
561 are predictable. *Nat Commun* 7, 11660. doi:10.1038/ncomms11660
- 562 5. Bates, D. M. and Watts, D. G. (1988). *Nonlinear Regression Analysis and Its Applications* (New  
563 York: Wiley)
- 564 6. Borrow, P., Lewicki, H., Hahn, B. H., Shaw, G. M., and Oldstone, M. B. (1994). Virus-specific  
565 CD8<sup>+</sup> cytotoxic T-lymphocyte activity associated with control of viremia in primary human  
566 immunodeficiency virus type 1 infection. *J. Virol.* 68, 6103–6110
- 567 7. Brown, L., Cai, T., DasGupta, A., Agresti, A., Coull, B., Casella, G., et al. (2001). Interval  
568 estimation for a binomial proportion. *Statistical Science* 16, 101–133
- 569 8. Burnham, K. P. and Anderson, D. R. (2002). *Model selection and multimodel inference : a*  
570 *practical information-theoretic approach* (New York: Springer)
- 571 9. De Boer, R. J., Homann, D., and Perelson, A. S. (2003). Different dynamics of CD4<sup>+</sup> and CD8<sup>+</sup>  
572 T cell responses during and after acute lymphocytic choriomeningitis virus infection. *J. Immunol.*  
573 171, 3928–3935
- 574 10. De Boer, R. J., Oprea, M., Antia, R., Murali-Krishna, K., Ahmed, R., and Perelson, A. S. (2001).  
575 Recruitment times, proliferation, and apoptosis rates during the CD8<sup>+</sup> T-cell response to lympho-  
576 cytic choriomeningitis virus. *Journal of Virology* 75, 10663–10669. doi:10.1128/jvi.75.22.10663-  
577 10669.2001
- 578 11. Efron, B. and Tibshirani, R. (1993). *An introduction to the bootstrap* (New York: Chapman &  
579 Hall)
- 580 12. Fernandez, C. S., Stratov, I., Rose, R. D., Walsh, K., Dale, C. J., Smith, M. Z., et al. (2005).  
581 Rapid viral escape at an immunodominant simian-human immunodeficiency virus cytotoxic T-  
582 lymphocyte epitope exacts a dramatic fitness cost. *Journal of Virology* 79, 5721–5731. doi:  
583 10.1128/jvi.79.9.5721-5731.2005

- 584 13. Ganusov, V. V. and Auerbach, J. (2014). Mathematical modeling reveals kinetics of  
585 lymphocyte recirculation in the whole organism. *PLoS Comp Biol* 10, e1003586. doi:  
586 10.1371/journal.pcbi.1003586
- 587 14. Ganusov, V. V., Barber, D. L., and De Boer, R. J. (2011). Killing of targets by CD8<sup>+</sup>  
588 T cells in the mouse spleen follows the law of mass action. *PLoS One* 6, e15959. doi:  
589 10.1371/journal.pone.0015959
- 590 15. Ganusov, V. V. and De Boer, R. J. (2006). Estimating costs and benefits of CTL escape mutations  
591 in SIV/HIV infection. *PLoS Comp Biol* 2, e24. doi:10.1371/journal.pcbi.0020024
- 592 16. Ganusov, V. V., Goonetilleke, N., Liu, M. K. P., Ferrari, G., Shaw, G. M., McMichael, A. J.,  
593 et al. (2011). Fitness costs and diversity of the cytotoxic t lymphocyte (CTL) response determine  
594 the rate of CTL escape during acute and chronic phases of HIV infection. *Journal of Virology*  
595 85, 10518–10528. doi:10.1128/jvi.00655-11
- 596 17. Ganusov, V. V., Neher, R. A., and Perelson, A. S. (2013). Mathematical modeling of escape of  
597 HIV from cytotoxic T lymphocyte responses. *J. Stat. Mech.* 2013, P01010. doi:10.1088/1742-  
598 5468/2013/01/p01010
- 599 18. Garcia, V., Feldman, M. W., and Regoes, R. R. (2016). Investigating the consequences of  
600 interference between multiple CD8<sup>+</sup> T cell escape mutations in early HIV infection. *PLoS*  
601 *Comput Biol* 12, e1004721. doi:10.1371/journal.pcbi.1004721
- 602 19. Garcia, V. and Regoes, R. R. (2015). The effect of interference on the CD8<sup>+</sup> T cell escape rates  
603 in HIV. *Front. Immunol.* 5. doi:10.3389/fimmu.2014.00661
- 604 20. Goonetilleke, N., Liu, M. K., Salazar-Gonzalez, J. F., Ferrari, G., Giorgi, E., Ganusov, V. V.,  
605 et al. (2009). The first T cell response to transmitted/founder virus contributes to the control  
606 of acute viremia in HIV-1 infection. *The Journal of Experimental Medicine* 206, 1253–1272.  
607 doi:10.1084/jem.20090365
- 608 21. Goulder, P. J. R. and Watkins, D. I. (2004). HIV and SIV CTL escape: implications for vaccine  
609 design. *Nature Reviews Immunology* 4, 630–640. doi:10.1038/nri1417
- 610 22. Haase, A. T. (1999). Population biology of HIV-1 infection: viral and CD4<sup>+</sup> T cell demographics  
611 and dynamics in lymphatic tissues. *Annu Rev Immunol* 17, 625–56
- 612 23. Hansen, S. G., Ford, J. C., Lewis, M. S., Ventura, A. B., Hughes, C. M., Coyne-Johnson, L., et al.  
613 (2011). Profound early control of highly pathogenic SIV by an effector memory T-cell vaccine.  
614 *Nature* 473, 523–527. doi:10.1038/nature10003
- 615 24. Josefsson, L., King, M. S., Makitalo, B., Brännström, J., Shao, W., Maldarelli, F., et al. (2011).  
616 Majority of CD4<sup>+</sup> T cells from peripheral blood of HIV-1-infected individuals contain only one  
617 HIV DNA molecule. *Proc Natl Acad Sci U S A* 108, 11199–204
- 618 25. Josefsson, L., Palmer, S., Faria, N. R., Lemey, P., Casazza, J., Ambrozak, D., et al. (2013).  
619 Single cell analysis of lymph node tissue from HIV-1 infected patients reveals that the ma-  
620 jority of CD4<sup>+</sup> T-cells contain one HIV-1 DNA molecule. *PLoS Pathog* 9, e1003432. doi:  
621 10.1371/journal.ppat.1003432

- 622 26. Kessinger, T. A., Perelson, A. S., and Neher, R. A. (2013). Inferring HIV escape rates from  
623 multi-locus genotype data. *Front. Immunol.* 4. doi:10.3389/fimmu.2013.00252
- 624 27. Kijak, G. H., Sanders-Buell, E., Chenine, A.-L., Eller, M. A., Goonetilleke, N., Thomas, R., et al.  
625 (2017). Rare HIV-1 transmitted/founder lineages identified by deep viral sequencing contribute  
626 to rapid shifts in dominant quasispecies during acute and early infection. *PLoS pathogens* 13,  
627 e1006510. doi:10.1371/journal.ppat.1006510
- 628 28. Leviyang, S. (2013). Computational inference methods for selective sweeps arising in acute HIV  
629 infection. *Genetics* 194, 737–752. doi:10.1534/genetics.113.150862
- 630 29. Leviyang, S. and Ganusov, V. V. (2015). Broad CTL response in early HIV infection  
631 drives multiple concurrent CTL escapes. *PLOS Computational Biology* 11, e1004492. doi:  
632 10.1371/journal.pcbi.1004492
- 633 30. Li, Q., Skinner, P. J., Ha, S. J., Duan, L., Mattila, T. L., Hage, A., et al. (2009). Visualizing  
634 antigen-specific and infected cells in situ predicts outcomes in early viral infection. *Science* 323,  
635 1726–1729. doi:10.1126/science.1168676
- 636 31. Liu, M. K., Hawkins, N., Ritchie, A. J., Ganusov, V. V., Whale, V., Brackenridge, S., et al.  
637 (2013). Vertical T cell immunodominance and epitope entropy determine HIV-1 escape. *Journal*  
638 *of Clinical Investigation* 123, 380–393. doi:10.1172/jci65330
- 639 32. Love, T. M. T., Thurston, S. W., Keefer, M. C., Dewhurst, S., and Lee, H. Y. (2010). Mathe-  
640 matical modeling of ultradeep sequencing data reveals that acute CD8<sup>+</sup> T-lymphocyte responses  
641 exert strong selective pressure in simian immunodeficiency virus-infected macaques but still fail  
642 to clear founder epitope sequences. *Journal of Virology* 84, 5802–5814. doi:10.1128/jvi.00117-10
- 643 33. Mandl, J. N., Regoes, R. R., Garber, D. A., and Feinberg, M. B. (2007). Estimating the ef-  
644 fectiveness of simian immunodeficiency virus-specific CD8<sup>+</sup> T cells from the dynamics of viral  
645 immune escape. *Journal of Virology* 81, 11982–11991. doi:10.1128/jvi.00946-07
- 646 34. Mansky, L. M. and Temin, H. M. (1995). Lower in vivo mutation rate of human immunodeficiency  
647 virus type 1 than that predicted from the fidelity of purified reverse transcriptase. *Journal of*  
648 *Virology* 69, 5087–5094
- 649 35. Martyushev, A. P., Petravic, J., Grimm, A. J., Alinejad-Rokny, H., Gooneratne, S. L., Reece,  
650 J. C., et al. (2015). Epitope-specific CD8<sup>+</sup> T cell kinetics rather than viral variability determine  
651 the timing of immune escape in simian immunodeficiency virus infection. *J Immunol* 194, 4112–  
652 4121. doi:10.4049/jimmunol.1400793
- 653 36. McMichael, A. J., Borrow, P., Tomaras, G. D., Goonetilleke, N., and Haynes, B. F. (2010). The  
654 immune response during acute HIV-1 infection: clues for vaccine development. *Nat Rev Immunol*  
655 10, 11–23. doi:10.1038/nri2674
- 656 37. McMichael, A. J. and Phillips, R. E. (1997). Escape of human immunodeficiency virus from  
657 immune control. *Annu. Rev. Immunol.* 15, 271–296
- 658 38. Ndhlovu, Z. M., Kanya, P., Mewalal, N., Kloverpris, H. N., Nkosi, T., Pretorius, K., et al. (2015).  
659 Magnitude and kinetics of CD8<sup>+</sup> T cell activation during hyperacute HIV infection impact viral  
660 set point. *Immunity* 43, 591–604. doi:10.1016/j.immuni.2015.08.012

- 661 39. Pandit, A. and De Boer, R. J. (2014). Reliable reconstruction of HIV-1 whole genome haplotypes  
662 reveals clonal interference and genetic hitchhiking among immune escape variants. *Retrovirology*  
663 11, 56. doi:10.1186/1742-4690-11-56
- 664 40. Perelson, A. S. (2002). Modelling viral and immune system dynamics. *Nature Rev Immunol* 2,  
665 28–36. doi:10.1038/nri700
- 666 41. Perelson, A. S., Neumann, A. U., Markowitz, M., Leonard, J. M., and Ho, D. D. (1996). HIV-1  
667 dynamics in vivo: Virion clearance rate, infected cell life-span, and viral generation time. *Science*  
668 271, 1582–1586. doi:10.1126/science.271.5255.1582
- 669 42. Petracic, J., Loh, L., Kent, S. J., and Davenport, M. P. (2008). Cd4<sup>+</sup> target cell availability  
670 determines the dynamics of immune escape and reversion in vivo. *Journal of Virology* 82, 4091–  
671 4101. doi:10.1128/jvi.02552-07
- 672 43. Ramratnam, B., Bonhoeffer, S., Binley, J., Hurley, A., Zhang, L., Mittler, J. E., et al. (1999).  
673 Rapid production and clearance of HIV-1 and hepatitis C virus assessed by large volume plasma  
674 apheresis. *The Lancet* 354, 1782–1785. doi:10.1016/s0140-6736(99)02035-8
- 675 44. Rolland, M., Tovanabutra, S., Decamp, A. C., Frahm, N., Gilbert, P. B., Sanders-Buell, E., et al.  
676 (2011). Genetic impact of vaccination on breakthrough HIV-1 sequences from the STEP trial.  
677 *Nat Med* 17, 366–371. doi:10.1038/nm.2316
- 678 45. Song, H., Pavlicek, J. W., Cai, F., Bhattacharya, T., Li, H., Iyer, S. S., et al. (2012). Impact  
679 of immune escape mutations on HIV-1 fitness in the context of the cognate transmitted/founder  
680 genome. *Retrovirology* 9, 89. doi:10.1186/1742-4690-9-89
- 681 46. Streeck, H., Jolin, J. S., Qi, Y., Yassine-Diab, B., Johnson, R. C., Kwon, D. S., et al. (2009).  
682 Human immunodeficiency virus type 1-specific CD8<sup>+</sup> T-cell responses during primary infection  
683 are major determinants of the viral set point and loss of CD4<sup>+</sup> T cells. *Journal of Virology* 83,  
684 7641–7648. doi:10.1128/jvi.00182-09
- 685 47. Turnbull, E. L., Wong, M., Wang, S., Wei, X., Jones, N. A., Conrod, K. E., et al. (2009). Kinetics  
686 of expansion of epitope-specific T cell responses during primary HIV-1 infection. *The Journal of*  
687 *Immunology* 182, 7131–7145. doi:10.4049/jimmunol.0803658
- 688 48. Van Deutekom, H. W. M., Wijnker, G., and De Boer, R. J. (2013). The rate of immune escape  
689 vanishes when multiple immune responses control an HIV infection. *The Journal of Immunology*  
690 191, 3277–3286. doi:10.4049/jimmunol.1300962
- 691 49. Walker, B. D., Ahmed, R., and Plotkin, S. (2011). Moving ahead an HIV vaccine: Use both  
692 arms to beat HIV. *Nature Medicine* 17, 1194–1195. doi:10.1038/nm.2529
- 693 50. WHO (2016). Global health observatory (GHO) data
- 694 51. WHO (2016). Global HIV and AIDS statistics
- 695 52. Wright, J. K., Brumme, Z. L., Carlson, J. M., Heckerman, D., Kadie, C. M., Brumme, C. J.,  
696 et al. (2010). Gag-protease-mediated replication capacity in HIV-1 subtype c chronic infection:  
697 Associations with HLA type and clinical parameters. *Journal of Virology* 84, 10820–10831. doi:  
698 10.1128/jvi.01084-10

## 699 Supplementary Information

### 700 S1 Model derivation of viral escape from multiple CTL responses

701 Following the previous work [16], we use  $m_{\mathbf{i}}$  to denote the density of variants denoted by a vector  
 702  $\mathbf{i} = (i_1, i_2, \dots, i_n)$ , which is the index denoting the positions of  $n$  epitopes, and we define  $i_j = 0$  if  
 703 there is no mutation in the  $j^{\text{th}}$  CTL epitope and  $i_j = 1$  if there is a mutation leading to an escape  
 704 from the  $j^{\text{th}}$  CTL response.

705 We assume that a CTL response that recognizes the  $i^{\text{th}}$  epitope of the virus kills the virus infected  
 706 cells at rate  $k_i$ , and escaping from the  $i^{\text{th}}$  CTL responses only at a rate  $\mu_i$  leads to a viral replicative  
 707 fitness cost  $c_i$  ( $i = 1, \dots, n$ ). As shown in model (1) of viral escape from a single CTL response (see  
 708 equation (1)), we denote the infection rate of variants  $m_{\mathbf{i}}$  by  $\beta_{\mathbf{i}}$  and variants  $m_{\mathbf{i}}$  are produced by  
 709 infected cells at rate  $p_{\mathbf{i}}$  ( $\mathbf{i} \in I$ ). We assume that the wild-type has a higher (or equal) reproductive  
 710 ratio, that is  $\beta_{\mathbf{i}}p_{\mathbf{i}} \leq \beta_{(0,0,\dots,0)}p_{(0,0,\dots,0)}$  for all  $\mathbf{i} \neq (0, 0, \dots, 0)$  ( $\mathbf{i} \in I$ ).

711 Let  $r = \frac{\beta_0 p_0}{c_v} T(t)$  (with  $\beta_0 = \beta_{(0,0,\dots,0)}$  and  $p_0 = p_{(0,0,\dots,0)}$ ) as the reproduction rate of wild-type  
 712 virus, we use fitness cost  $c_i$  ( $i = 1, \dots, n$ ) and  $r$  to express the replication rate of each escape variant.  
 713 For simplicity, we neglect recombination and only allow single point mutation. To be consistent  
 714 with the model of viral escape from a single CTL escape, we let  $\beta_i$  denote the rate at which variant  
 715  $m_{(0,\dots,1,\dots,0)}$  (only  $i^{\text{th}}$  position equal to 1) infect cells, and  $p_i$  denote the production rate of variant  
 716  $m_{(0,\dots,1,\dots,0)}$ . Then the fitness cost  $c_i$  of  $m_{(0,\dots,1,\dots,0)}$  can be written as  $c_i = 1 - \frac{\beta_i p_i}{\beta_0 p_0}$  ( $i = 1, \dots, n$ ). As  
 717 for variants  $m_{(i_1,\dots,i_n)}$  having two more mutations, we assume

$$\frac{\beta_{(i_1,\dots,i_n)}p_{(i_1,\dots,i_n)}}{\beta_0 p_0} = \prod_{\substack{j=1,\dots,n \\ i_j \neq 0}} \frac{\beta_j p_j}{\beta_0 p_0}. \quad (\text{S1})$$

718 This assumption means for variant having mutations at  $i^{\text{th}}$  and  $j^{\text{th}}$  epitopes, the normalized reproduc-  
 719 tive rate (by wild-type reproductive rate  $\beta_0 p_0$ ) equals the product of normalized reproductive rates of  
 720 variants, which only have one mutation at  $i^{\text{th}}$  or  $j^{\text{th}}$  epitope. For example,  $\frac{\beta_{(1,1)}p_{(1,1)}}{\beta_0 p_0} = \frac{\beta_1 p_1}{\beta_0 p_0} \frac{\beta_2 p_2}{\beta_0 p_0}$  with  
 721  $n = 2$ . Under this assumption, the fitness cost  $C_{(i_1,\dots,i_n)} = 1 - \frac{\beta_{(i_1,\dots,i_n)}p_{(i_1,\dots,i_n)}}{\beta_0 p_0}$  of variant  $m_{(i_1,\dots,i_n)}$  can  
 722 be written as

$$C_{(i_1,\dots,i_n)} = 1 - \prod_{\substack{j=1,\dots,n \\ i_j \neq 0}} (1 - c_j). \quad (\text{S2})$$

723 Assuming multiplicative fitness, the fitness cost of a variant  $\mathbf{i} = (i_1, i_2, \dots, i_n)$  is  $C_{\mathbf{i}} = 1 - \prod_{j=1}^n (1 - c_j i_j)$ .  
 724 The death rate of the escape variant  $\mathbf{i} = (i_1, i_2, \dots, i_n)$  due to remaining CTL responses is given by  
 725  $K_{\mathbf{i}} = \sum_{j=1}^n k_j (1 - i_j)$ , where we assume that killing of infected cells by different CTL responses is  
 726 additive.

727 We neglect recombination and backward mutation from mutant to wild-type in this modeling  
 728 framework. More specifically, for two escape variants  $m_{\mathbf{i}} = m_{(i_1, i_2, \dots, i_n)}$  and  $m_{\mathbf{j}} = m_{(j_1, j_2, \dots, j_n)}$ , we  
 729 define the mutation rate  $M_{\mathbf{i}, \mathbf{j}}$  from  $m_{\mathbf{i}}$  to  $m_{\mathbf{j}}$  as  $\mu_k$ , if and only if  $m_{\mathbf{j}}$  has only one more mutation at  
 730 position  $k$  than  $m_{\mathbf{i}}$  and all other positions are exactly same. For example, when there are 3 CTL  
 731 responses, the mutation rate from  $m_{(1,0,0)}$  to  $m_{(1,0,1)}$  is  $\mu_3$ , and the mutation rate from  $m_{(0,0,0)}$  to  
 732  $m_{(1,0,1)}$  is 0.

733 Similar as equation (1), the dynamics of the wild-type and all escapes from CTL responses is

734 given by

$$\frac{dm_{\mathbf{i}}(t)}{dt} = [r(1 - C_{\mathbf{i}})(1 - \sum_{\mathbf{j} \in I} M_{\mathbf{i},\mathbf{j}}) - K_{\mathbf{i}} - \delta]m_{\mathbf{i}}(t) + \sum_{\mathbf{j} \in I} r(1 - C_{\mathbf{j}})M_{\mathbf{j},\mathbf{i}} \frac{p_{\mathbf{i}}}{p_{\mathbf{j}}} m_{\mathbf{j}}(t), \quad \mathbf{i} \in I. \quad (\text{S3})$$

735 Here we adopt the simple assumption that escape mutants and wild-type viruses may differ from  
 736 rates  $\beta_{\mathbf{i} \in I}$  at which they infect cells, that is  $p_0 = p_{\mathbf{i}}$  and  $\beta_0 \geq \beta_{\mathbf{i}}$  ( $\mathbf{i} \in I$  and  $\mathbf{i} \neq (0, \dots, 0)$ ). The system  
 737 (S3) becomes

$$\frac{dm_{\mathbf{i}}(t)}{dt} = [r(1 - C_{\mathbf{i}})(1 - \sum_{\mathbf{j} \in I} M_{\mathbf{i},\mathbf{j}}) - K_{\mathbf{i}} - \delta]m_{\mathbf{i}}(t) + \sum_{\mathbf{j} \in I} r(1 - C_{\mathbf{j}})M_{\mathbf{j},\mathbf{i}}m_{\mathbf{j}}(t), \quad \mathbf{i} \in I. \quad (\text{S4})$$

738 We define  $M(t) = \sum_{\mathbf{i} \in I} m_{\mathbf{i}}$  as the total density of all variants in the population, and  $f_j(t)$   
 739 ( $j = 1, \dots, n$ ) is the fraction of viral variants that have escaped recognition from the  $j^{\text{th}}$  CTL response.  
 740 Then

$$f_j(t) = \sum_{\mathbf{i} \in J} m_{\mathbf{i}}(t)/M(t), \quad J = (i_1, \dots, i_j, \dots, i_n) \text{ with } i_j = 1. \quad (\text{S5})$$

741 For example, when  $n = 2$ , there are 3 types of escape variants  $m_{(0,0)}$ ,  $m_{(1,0)}$  and  $m_{(1,1)}$  for  
 742 “sequential” escape (model 2), and 4 types of escape variants  $m_{(0,0)}$ ,  $m_{(1,0)}$ ,  $m_{(0,1)}$  and  $m_{(1,1)}$  for  
 743 “concurrent” escape (model 3).

744 Under all above assumptions, from system (S4), model 2 with  $n = 2$  can be written as:

$$\begin{aligned} \frac{dm_{(0,0)}(t)}{dt} &= [r(t)(1 - \mu_1) - (\delta + k_1 + k_2)]m_{(0,0)}(t), \\ \frac{dm_{(1,0)}(t)}{dt} &= [r(t)(1 - c_1)(1 - \mu_2) - (\delta + k_2)]m_{(1,0)}(t) + \mu_1 r(t)m_{(0,0)}(t), \\ \frac{dm_{(1,1)}(t)}{dt} &= [r(t)(1 - c_1)(1 - c_2) - \delta]m_{(1,1)}(t) + r(t)(1 - c_1)\mu_2 m_{(1,0)}(t). \end{aligned} \quad (\text{S6})$$

745 and

$$\begin{aligned} f_1(t) &= \frac{m_{(1,0)}(t) + m_{(1,1)}(t)}{m_{(0,0)}(t) + m_{(1,0)}(t) + m_{(1,1)}(t)}, \\ f_2(t) &= \frac{m_{(1,1)}(t)}{m_{(0,0)}(t) + m_{(1,0)}(t) + m_{(1,1)}(t)}. \end{aligned} \quad (\text{S7})$$

746 Similarly, following system (S4), model 3 with  $n = 2$  can be written as:

$$\begin{aligned} \frac{dm_{(0,0)}(t)}{dt} &= [r(t)(1 - \mu_1 - \mu_2) - (\delta + k_1 + k_2)]m_{(0,0)}(t), \\ \frac{dm_{(1,0)}(t)}{dt} &= [r(t)(1 - c_1)(1 - \mu_2) - (\delta + k_2)]m_{(1,0)}(t) + \mu_1 r(t)m_{(0,0)}(t), \\ \frac{dm_{(0,1)}(t)}{dt} &= [r(t)(1 - c_2)(1 - \mu_1) - (\delta + k_1)]m_{(0,1)}(t) + \mu_2 r(t)m_{(0,0)}(t), \\ \frac{dm_{(1,1)}(t)}{dt} &= [r(t)(1 - c_1)(1 - c_2) - \delta]m_{(1,1)}(t) + r(t)(1 - c_2)\mu_1 m_{(0,1)}(t) \\ &\quad + r(t)(1 - c_1)\mu_2 m_{(1,0)}(t). \end{aligned} \quad (\text{S8})$$



747 and

$$\begin{aligned} f_1(t) &= \frac{m_{(1,0)}(t) + m_{(1,1)}(t)}{m_{(0,0)}(t) + m_{(0,1)}(t) + m_{(1,0)}(t) + m_{(1,1)}(t)}, \\ f_2(t) &= \frac{m_{(0,1)}(t) + m_{(1,1)}(t)}{m_{(0,0)}(t) + m_{(0,1)}(t) + m_{(1,0)}(t) + m_{(1,1)}(t)}. \end{aligned} \quad (\text{S9})$$

748 **S2 Examples of “sequential” and “concurrent” escapes for  $n = 3$  epi-**  
749 **topes/CTL responses**

750 The difference between “sequential” escape (model 2) and “concurrent” escape (model 3) is the set  
751 of escape variants  $I$ . The set  $I$  has  $n + 1$  elements for “sequential” escape model and  $2^n$  elements for  
752 “concurrent” escape model for  $n$  epitope case. For the simple case  $n = 3$ , equations for all escape  
753 variants are

**Model 2:**

$$\begin{aligned} \frac{dm_{(0,0,0)}(t)}{dt} &= [r(t)(1 - \mu_1) - (\delta + k_1 + k_2 + k_3)]m_{(0,0,0)}(t), \\ \frac{dm_{(1,0,0)}(t)}{dt} &= [r(t)(1 - c_1)(1 - \mu_2) - (\delta + k_2 + k_3)]m_{(1,0,0)}(t) + \mu_1 r(t)m_{(0,0,0)}(t), \\ \frac{dm_{(1,1,0)}(t)}{dt} &= [r(t)(1 - c_1)(1 - c_2)(1 - \mu_3) - (\delta + k_3)]m_{(1,1,0)}(t) + \mu_2 r(t)(1 - c_1)m_{(1,0,0)}(t), \\ \frac{dm_{(1,1,1)}(t)}{dt} &= [r(t)(1 - c_1)(1 - c_2)(1 - c_3) - \delta]m_{(1,1,1)}(t) + \mu_3 r(t)(1 - c_1)(1 - c_2)m_{(1,1,0)}(t), \end{aligned} \quad (\text{S10})$$

754 and

**Model 3:**

$$\begin{aligned} \frac{dm_{(0,0,0)}(t)}{dt} &= [r(t)(1 - \mu_1 - \mu_2 - \mu_3) - (\delta + k_1 + k_2 + k_3)]m_{(0,0,0)}(t), \\ \frac{dm_{(1,0,0)}(t)}{dt} &= [r(t)(1 - c_1)(1 - \mu_2 - \mu_3) - (\delta + k_2 + k_3)]m_{(1,0,0)}(t) + \mu_1 r(t)m_{(0,0,0)}(t), \\ \frac{dm_{(0,1,0)}(t)}{dt} &= [r(t)(1 - c_2)(1 - \mu_1 - \mu_3) - (\delta + k_1 + k_3)]m_{(0,1,0)}(t) + \mu_2 r(t)m_{(0,0,0)}(t), \\ \frac{dm_{(0,0,1)}(t)}{dt} &= [r(t)(1 - c_3)(1 - \mu_1 - \mu_2) - (\delta + k_1 + k_2)]m_{(0,0,1)}(t) + \mu_3 r(t)m_{(0,0,0)}(t), \\ \frac{dm_{(1,1,0)}(t)}{dt} &= [r(t)(1 - c_1)(1 - c_2)(1 - \mu_3) - (\delta + k_3)]m_{(1,1,0)}(t) + \mu_1(1 - c_2)r(t)m_{(0,1,0)}(t) \\ &\quad + \mu_2(1 - c_1)r(t)m_{(1,0,0)}(t), \\ \frac{dm_{(1,0,1)}(t)}{dt} &= [r(t)(1 - c_1)(1 - c_3)(1 - \mu_2) - (\delta + k_2)]m_{(1,0,1)}(t) + \mu_1(1 - c_3)r(t)m_{(0,0,1)}(t) \\ &\quad + \mu_3(1 - c_1)r(t)m_{(1,0,0)}(t), \\ \frac{dm_{(0,1,1)}(t)}{dt} &= [r(t)(1 - c_2)(1 - c_3)(1 - \mu_1) - (\delta + k_1)]m_{(0,1,1)}(t) + \mu_2(1 - c_3)r(t)m_{(0,0,1)}(t) \\ &\quad + \mu_3(1 - c_2)r(t)m_{(0,1,0)}(t), \\ \frac{dm_{(1,1,1)}(t)}{dt} &= [r(t)(1 - c_1)(1 - c_2)(1 - c_3) - \delta]m_{(1,1,1)}(t) + \mu_1(1 - c_2)(1 - c_3)r(t)m_{(0,1,1)}(t) \\ &\quad + \mu_2(1 - c_1)(1 - c_3)r(t)m_{(1,0,1)}(t) + \mu_3(1 - c_1)(1 - c_2)r(t)m_{(1,1,0)}(t). \end{aligned} \quad (\text{S11})$$

755 S3 Additional results of the analysis

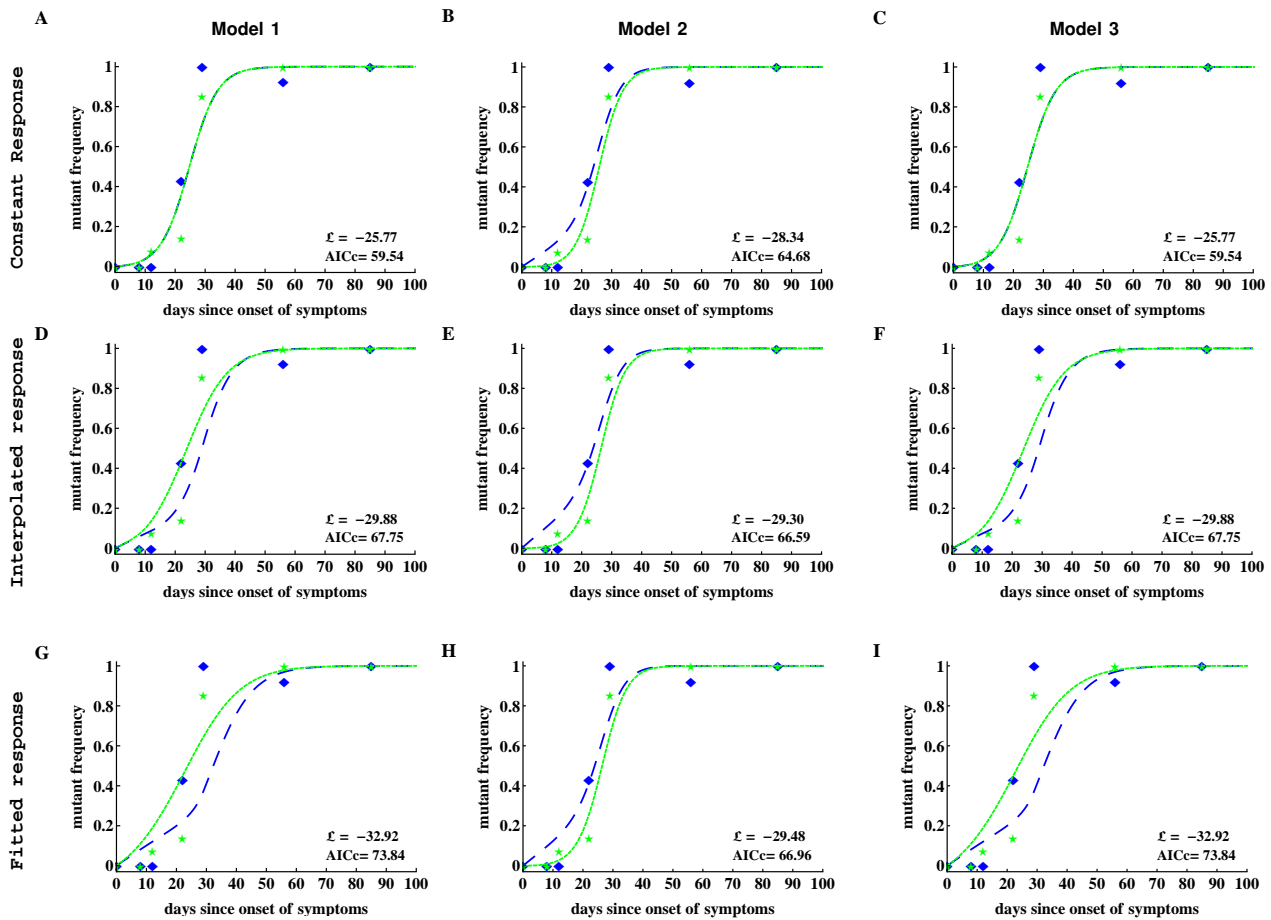

**Figure S1:** Mathematical model accurately explains kinetics of HIV escape from CTL response when assuming equal mutation rates ( $\mu_1 = \mu_2$ ) for data from patient CH159. We fit the three mathematical models (models 1, 2, and 3) to experimental data using likelihood approach outlined in the Materials and Methods section assuming  $\mu_1 = \mu_2$ . Three different models for the CTL response dynamics were assumed: constant input, interpolated input and fitted input. Models with response input did not improve the quality of the model fit to data. The best fit was provided by the models 1&3 with constant response. Estimated parameter values are given in Table S1. Notations for data points and lines are identical to those given in Figure 4 in the main text.

|                          | peptide     | model 1                              |                                  | model 2                              |                                  | model 3                              |                                  |
|--------------------------|-------------|--------------------------------------|----------------------------------|--------------------------------------|----------------------------------|--------------------------------------|----------------------------------|
|                          |             | mutation rate<br>( $\mu_i, i=1,2$ )  | killing rate<br>( $k_i, i=1,2$ ) | mutation rate<br>( $\mu_i, i=1,2$ )  | killing rate<br>( $k_i, i=1,2$ ) | mutation rate<br>( $\mu_i, i=1,2$ )  | killing rate<br>( $k_i, i=1,2$ ) |
| constant<br>response     | Rev 65-82   | $7.55 \times 10^{-4}$                | 0.21                             | $6.75 \times 10^{-3}$                | $1.86 \times 10^{-13}$           | $7.55 \times 10^{-4}$                | 0.21                             |
|                          | Nef 177-194 |                                      | 0.21                             |                                      | 0.25                             |                                      | 0.21                             |
|                          |             | $\mathcal{L} = -25.77, AICc = 59.54$ |                                  | $\mathcal{L} = -28.34, AICc = 64.68$ |                                  | $\mathcal{L} = -25.77, AICc = 59.54$ |                                  |
| interpolated<br>response | Rev 65-82   | $5.98 \times 10^{-3}$                | $3.07 \times 10^{-3}$            | $8.88 \times 10^{-3}$                | $3.69 \times 10^{-12}$           | $4.98 \times 10^{-3}$                | $3.07 \times 10^{-3}$            |
|                          | Nef 177-194 |                                      | $1.51 \times 10^{-3}$            |                                      | $2.74 \times 10^{-3}$            |                                      | $1.51 \times 10^{-3}$            |
|                          |             | $\mathcal{L} = -29.88, AICc = 67.75$ |                                  | $\mathcal{L} = -29.30, AICc = 66.59$ |                                  | $\mathcal{L} = -29.88, AICc = 67.75$ |                                  |
| fitted<br>response       | Rev 65-82   | $8.73 \times 10^{-3}$                | $1.98 \times 10^{-3}$            | $8.19 \times 10^{-3}$                | $6.32 \times 10^{-9}$            | $8.72 \times 10^{-3}$                | $1.98 \times 10^{-3}$            |
|                          | Nef 177-194 |                                      | $9.22 \times 10^{-4}$            |                                      | $2.69 \times 10^{-3}$            |                                      | $9.23 \times 10^{-4}$            |
|                          |             | $\mathcal{L} = -34.92, AICc = 77.85$ |                                  | $\mathcal{L} = -29.48, AICc = 66.97$ |                                  | $\mathcal{L} = -34.92, AICc = 77.85$ |                                  |

**Table S1:** Best fit parameters of three models (models 1, 2 and 3) fitted to experimental data on HIV escape in patient CH159 assuming identical mutation rates ( $\mu_1 = \mu_2$ ). Model fits are shown in Figure S1.  $\mathcal{L}$  and AICc give the log-likelihood score and the correlated Akaike information criterion value, respectively. Best  $\mathcal{L}$  (maximum) and AICc (minimum) scores are shown in bold. Mutation rates which exceed a theoretically assumed maximum value of  $10^{-3}$  are shown in italics.

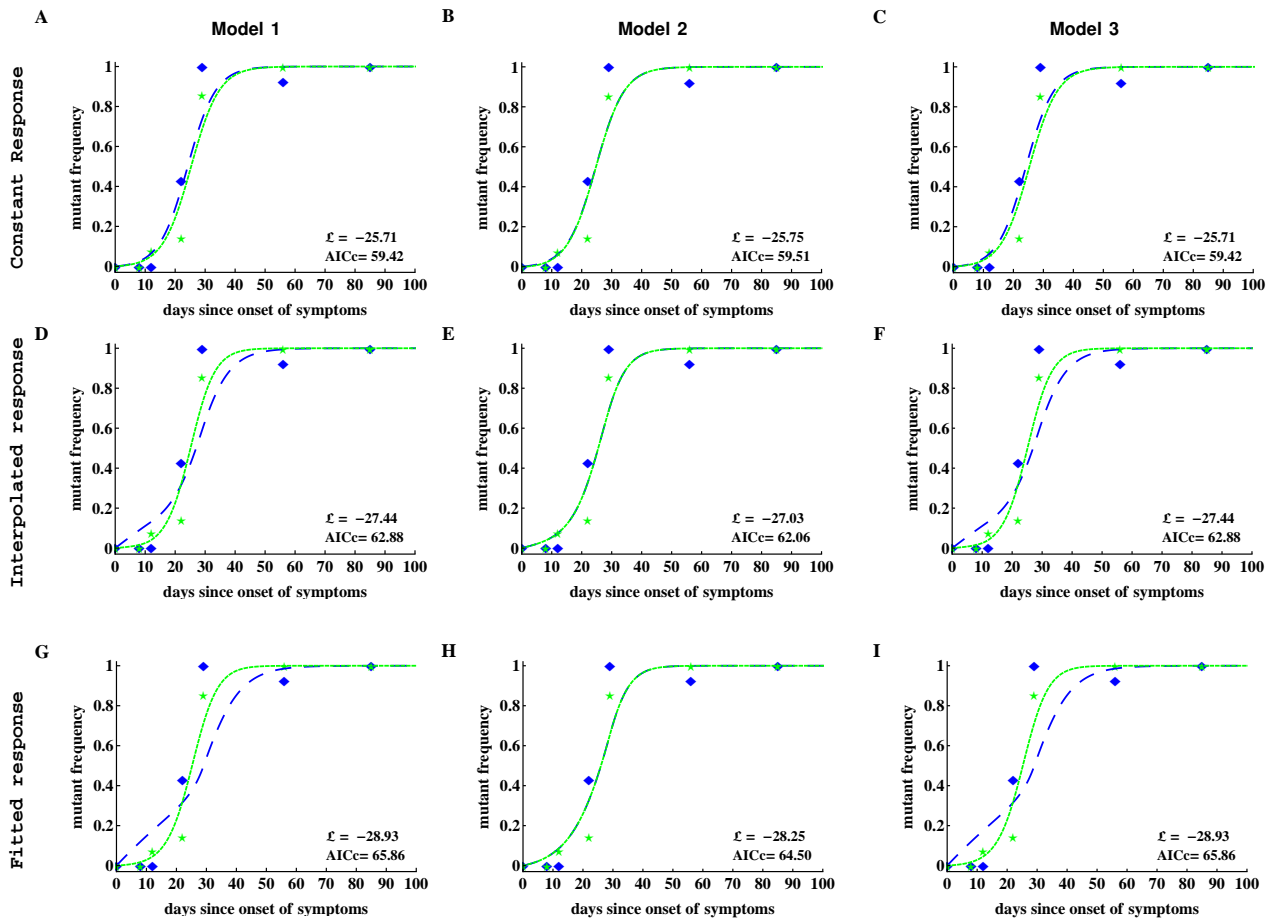

**Figure S2:** Killing rates of CTL responses specific to different epitopes may be similar. We fit three different models to experimental data from patient CH159 assuming identical CTL killing rates ( $k_1 = k_2$ ) with different CTL response dynamics (constant input, interpolated input and fitted input). Such constrain did not reduce the quality of the model fit to data as judged by AIC. Parameter estimates are given in Table S2. Notations for data points and lines are identical to those given in Figure 4 in the main text.

|                          | peptide     | model 1                              |                                  | model 2                              |                                  | model 3                              |                                  |
|--------------------------|-------------|--------------------------------------|----------------------------------|--------------------------------------|----------------------------------|--------------------------------------|----------------------------------|
|                          |             | mutation rate<br>( $\mu_i, i=1,2$ )  | killing rate<br>( $k_i, i=1,2$ ) | mutation rate<br>( $\mu_i, i=1,2$ )  | killing rate<br>( $k_i, i=1,2$ ) | mutation rate<br>( $\mu_i, i=1,2$ )  | killing rate<br>( $k_i, i=1,2$ ) |
| constant<br>response     | Rev 65-82   | $8.39 \times 10^{-4}$                | 0.21                             | $9.75 \times 10^{-4}$                | 0.10                             | $8.39 \times 10^{-4}$                | 0.21                             |
|                          | Nef 177-194 | $6.61 \times 10^{-4}$                |                                  | <i>0.30</i>                          |                                  | $6.61 \times 10^{-4}$                |                                  |
|                          |             | $\mathcal{L} = -25.71, AICc = 59.42$ |                                  | $\mathcal{L} = -25.75, AICc = 59.51$ |                                  | $\mathcal{L} = -25.71, AICc = 59.42$ |                                  |
| interpolated<br>response | Rev 65-82   | $7.71 \times 10^{-3}$                | $2.75 \times 10^{-3}$            | $2.60 \times 10^{-3}$                | $1.50 \times 10^{-3}$            | $7.70 \times 10^{-3}$                | $2.75 \times 10^{-3}$            |
|                          | Nef 177-194 | $8.91 \times 10^{-4}$                |                                  | <i>13282.59</i>                      |                                  | $8.85 \times 10^{-4}$                |                                  |
|                          |             | $\mathcal{L} = -27.44, AICc = 62.88$ |                                  | $\mathcal{L} = -27.03, AICc = 62.06$ |                                  | $\mathcal{L} = -27.44, AICc = 62.88$ |                                  |
| fitted<br>response       | Rev 65-82   | $1.26 \times 10^{-2}$                | $2.35 \times 10^{-3}$            | $2.34 \times 10^{-3}$                | $1.69 \times 10^{-3}$            | $1.26 \times 10^{-2}$                | $2.35 \times 10^{-3}$            |
|                          | Nef 177-194 | $9.34 \times 10^{-4}$                |                                  | <i>7186.74</i>                       |                                  | $9.33 \times 10^{-4}$                |                                  |
|                          |             | $\mathcal{L} = -30.53, AICc = 69.06$ |                                  | $\mathcal{L} = -29.33, AICc = 66.66$ |                                  | $\mathcal{L} = -30.53, AICc = 69.06$ |                                  |

**Table S2:** Best fit parameters of three models (models 1, 2 and 3) fitted to experimental data on HIV escape in patient CH159 assuming identical killing rates ( $k_1 = k_2$ ). Model fits are shown in Figure S2. High (perhaps unrealistic) mutation rates are highlighted in italic.  $\mathcal{L}$  and AICc give the log-likelihood score and the correlated Akaike information criterion value, respectively. Best  $\mathcal{L}$  (maximum) and AICc (minimum) scores are shown in bold.

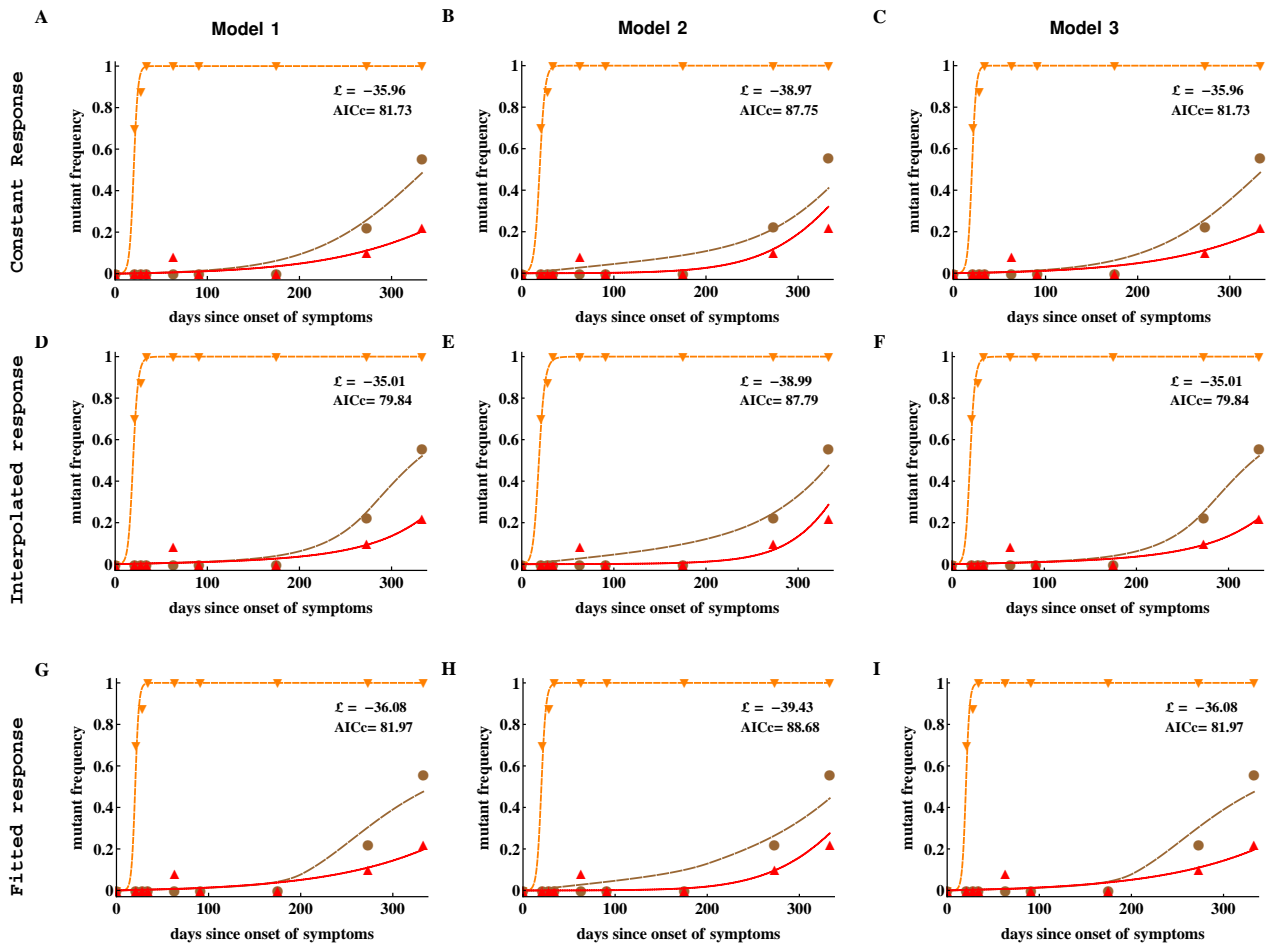

**Figure S3:** Mathematical models accurately explain kinetics of HIV escape from CTL response when assuming equal mutation rates ( $\mu_1 = \mu_2 = \mu_3$ ) for data from patient CH131. We fit the three mathematical models (models 1, 2, and 3) to experimental data using likelihood approach outlined in the Materials and Methods section assuming  $\mu_1 = \mu_2 = \mu_3$ . Three different models for the CTL response dynamics were assumed: no input, interpolated input and fitted input. Best model fit was provided by the models 1&3 with interpolated response input. Estimated parameter values are given in Table S3. Notations for data points and lines are identical to those given in Figure 6 in the main text.



|                       | peptide     | model 1                                   |                                        | model 2                                   |                                        | model 3                                   |                                        |
|-----------------------|-------------|-------------------------------------------|----------------------------------------|-------------------------------------------|----------------------------------------|-------------------------------------------|----------------------------------------|
|                       |             | mutation rate<br>( $\mu_i, i = 1, 2, 3$ ) | killing rate<br>( $k_i, i = 1, 2, 3$ ) | mutation rate<br>( $\mu_i, i = 1, 2, 3$ ) | killing rate<br>( $k_i, i = 1, 2, 3$ ) | mutation rate<br>( $\mu_i, i = 1, 2, 3$ ) | killing rate<br>( $k_i, i = 1, 2, 3$ ) |
| Constant response     | Nef 64-74   | $4.34 \times 10^{-5}$                     | 0.44                                   | $3.05 \times 10^{-4}$                     | 0.34                                   | $4.34 \times 10^{-5}$                     | 0.44                                   |
|                       | Env 709-726 |                                           | 0.016                                  |                                           | $1.44 \times 10^{-10}$                 |                                           | 0.016                                  |
|                       | Gag 156-173 |                                           | 0.011                                  |                                           | 0.021                                  |                                           | 0.011                                  |
|                       |             | $\mathcal{L} = -35.96, AICc = 81.73$      |                                        | $\mathcal{L} = -38.97, AICc = 87.75$      |                                        | $\mathcal{L} = -35.96, AICc = 81.73$      |                                        |
| interpolated response | Nef 64-74   | $6.22 \times 10^{-5}$                     | $2.53 \times 10^{-4}$                  | $3.00 \times 10^{-4}$                     | $2.07 \times 10^{-4}$                  | $6.22 \times 10^{-5}$                     | $2.53 \times 10^{-4}$                  |
|                       | Env 709-726 |                                           | $1.87 \times 10^{-5}$                  |                                           | $5.33 \times 10^{-6}$                  |                                           | $1.87 \times 10^{-5}$                  |
|                       | Gag 156-173 |                                           | $8.73 \times 10^{-6}$                  |                                           | $1.24 \times 10^{-5}$                  |                                           | $8.73 \times 10^{-6}$                  |
|                       |             | $\mathcal{L} = -35.01, AICc = 79.84$      |                                        | $\mathcal{L} = -38.99, AICc = 87.79$      |                                        | $\mathcal{L} = -35.01, AICc = 79.84$      |                                        |
| fitted response       | Nef 64-74   | $7.48 \times 10^{-5}$                     | $6.72 \times 10^{-4}$                  | $3.21 \times 10^{-4}$                     | $5.41 \times 10^{-4}$                  | $7.65 \times 10^{-5}$                     | $6.70 \times 10^{-4}$                  |
|                       | Env 709-726 |                                           | $1.19 \times 10^{-5}$                  |                                           | $2.88 \times 10^{-6}$                  |                                           | $1.18 \times 10^{-5}$                  |
|                       | Gag 156-173 |                                           | $5.82 \times 10^{-6}$                  |                                           | $1.00 \times 10^{-5}$                  |                                           | $5.74 \times 10^{-6}$                  |
|                       |             | $\mathcal{L} = -36.08, AICc = 81.97$      |                                        | $\mathcal{L} = -39.43, AICc = 88.68$      |                                        | $\mathcal{L} = -36.08, AICc = 81.97$      |                                        |

**Table S3:** Best fit parameter values found by fitting different mathematical models (models 1, 2 and 3) to experimental data in patient CH131 assuming identical mutation rates ( $\mu_1 = \mu_2 = \mu_3$ ). Model fits are shown in Figure S3.  $\mathcal{L}$  and AICc give the log-likelihood score and the correlated Akaike information criterion value, respectively. Best  $\mathcal{L}$  (maximum) and AICc (minimum) scores are bolded in the table.

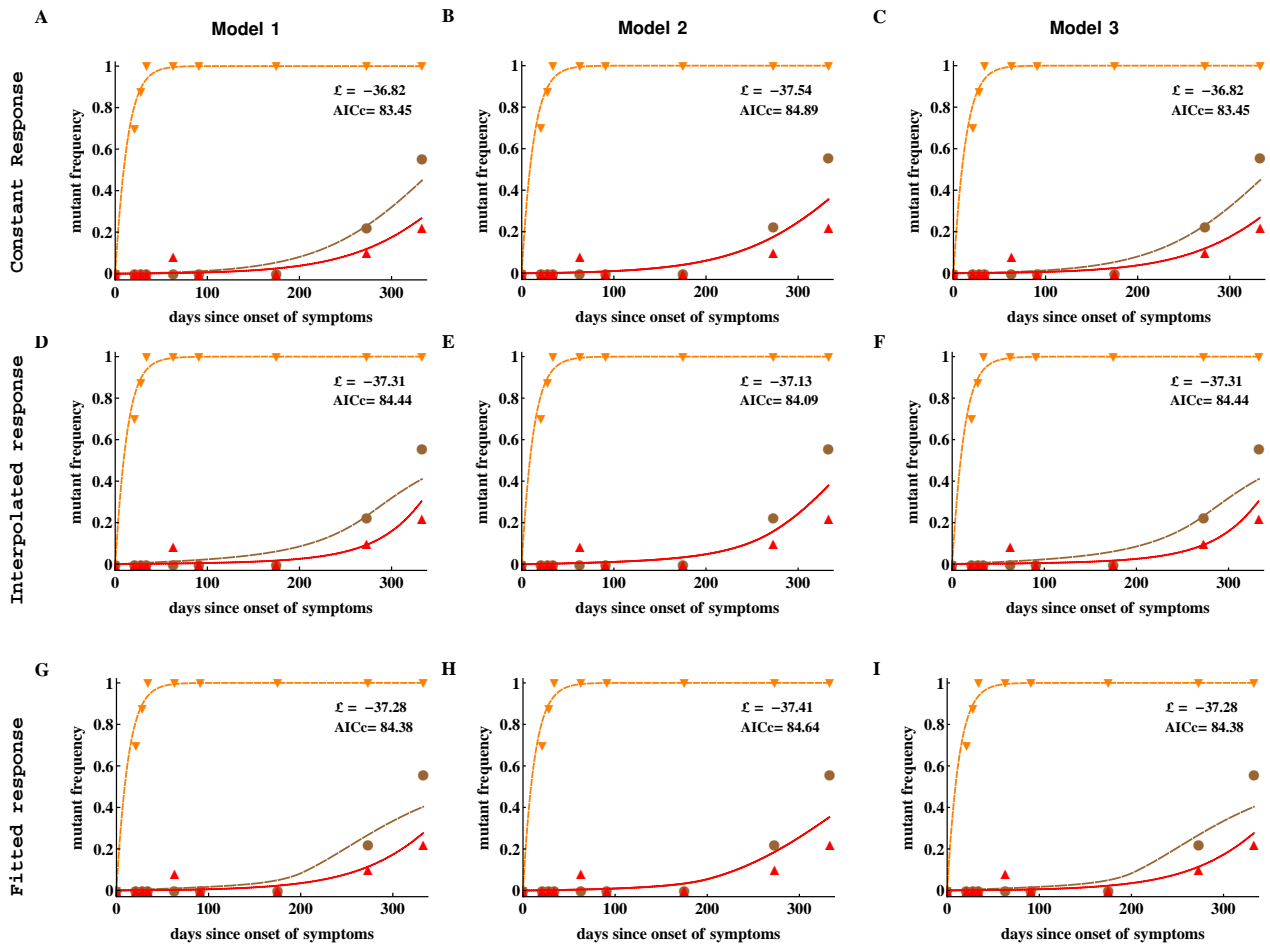

**Figure S4:** No evidence for difference in CTL killing rates for data on HIV escape in patient CH131. We fit different mathematical models (models 1, 2, or 3) to experimental data from patient CH131 assuming equal killing rates ( $k_1 = k_2 = k_3$ ). The best fit is given by models 1&3 with interpolated response input. Best fit parameter values are given in Table S4. Notations for data points and lines are identical to those given in Figure 6 in the main text.

|                          | peptide     | model 1                                                |                                        | model 2                                   |                                        | model 3                                                |                                        |
|--------------------------|-------------|--------------------------------------------------------|----------------------------------------|-------------------------------------------|----------------------------------------|--------------------------------------------------------|----------------------------------------|
|                          |             | mutation rate<br>( $\mu_i, i = 1, 2, 3$ )              | killing rate<br>( $k_i, i = 1, 2, 3$ ) | mutation rate<br>( $\mu_i, i = 1, 2, 3$ ) | killing rate<br>( $k_i, i = 1, 2, 3$ ) | mutation rate<br>( $\mu_i, i = 1, 2, 3$ )              | killing rate<br>( $k_i, i = 1, 2, 3$ ) |
| Constant<br>response     | Nef 64-74   | <i>0.047</i>                                           | 0.017                                  | <i>0.051</i>                              | $7.88 \times 10^{-3}$                  | <i>0.047</i>                                           | 0.016                                  |
|                          | Env 709-726 | $3.68 \times 10^{-5}$                                  |                                        | $3.60 \times 10^{-5}$                     |                                        | $3.69 \times 10^{-5}$                                  |                                        |
|                          | Gag 156-173 | $1.67 \times 10^{-5}$                                  |                                        | <i>81454.11</i>                           |                                        | $1.68 \times 10^{-5}$                                  |                                        |
|                          |             | $\mathcal{L} = -\mathbf{36.82}, AICc = \mathbf{83.45}$ |                                        | $\mathcal{L} = -37.54, AICc = 84.89$      |                                        | $\mathcal{L} = -\mathbf{36.82}, AICc = \mathbf{83.45}$ |                                        |
| interpolated<br>response | Nef 64-74   | <i>0.046</i>                                           | $1.28 \times 10^{-5}$                  | <i>0.050</i>                              | $6.65 \times 10^{-6}$                  | <i>0.046</i>                                           | $1.28 \times 10^{-5}$                  |
|                          | Env 709-726 | $1.31 \times 10^{-4}$                                  |                                        | $6.82 \times 10^{-5}$                     |                                        | $1.31 \times 10^{-4}$                                  |                                        |
|                          | Gag 156-173 | $3.09 \times 10^{-5}$                                  |                                        | <i><math>2.39 \times 10^7</math></i>      |                                        | $3.07 \times 10^{-5}$                                  |                                        |
|                          |             | $\mathcal{L} = -37.31, AICc = 84.44$                   |                                        | $\mathcal{L} = -37.13, AICc = 84.09$      |                                        | $\mathcal{L} = -37.31, AICc = 84.44$                   |                                        |
| fitted<br>response       | Nef 64-74   | <i>0.051</i>                                           | $9.79 \times 10^{-6}$                  | <i>0.053</i>                              | $5.07 \times 10^{-6}$                  | <i>0.051</i>                                           | $9.78 \times 10^{-6}$                  |
|                          | Env 709-726 | $1.02 \times 10^{-4}$                                  |                                        | $5.51 \times 10^{-5}$                     |                                        | $1.02 \times 10^{-4}$                                  |                                        |
|                          | Gag 156-173 | $2.67 \times 10^{-5}$                                  |                                        | <i><math>2.73 \times 10^7</math></i>      |                                        | $2.67 \times 10^{-5}$                                  |                                        |
|                          |             | $\mathcal{L} = -37.28, AICc = 84.38$                   |                                        | $\mathcal{L} = -37.41, AICc = 84.64$      |                                        | $\mathcal{L} = -37.28, AICc = 84.38$                   |                                        |

**Table S4:** Best fit parameter values found by fitting different mathematical models (models 1, 2 and 3) to experimental data in patient CH131 assuming identical killing rates ( $k_1 = k_2 = k_3$ ). Model fits are shown in Figure S3.  $\mathcal{L}$  and AICc give the log-likelihood score and the correlated Akaike information criterion value, respectively. Best  $\mathcal{L}$  (maximum) and AICc (minimum) scores are bolded in the table. High (perhaps unrealistic) mutation rates are highlighted in italic.
